## A class act: conservation of homeodomain protein functions

J. Robert Manak and Matthew P. Scott

Departments of Developmental Biology and Genetics, Howard Hughes Medical Institute, Stanford University School of Medicine, Stanford, California 94305-5427, USA

### SUMMARY

**Dramatic successes in identifying vertebrate homeobox genes closely related to their insect relatives have led to the recognition of classes within the homeodomain superfamily. To what extent are the homeodomain protein classes dedicated to specific functions during development? Although information on vertebrate gene functions is limited, existing evidence from mice and nematodes clearly supports conservation of function for the Hox genes. Less compelling, but still remarkable, is the conservation of other homeobox gene classes and of regulators of homeotic gene expression and function. It is too soon to say whether the cases of conservation are unique and exceptional, or the beginning of a profoundly unified view of gene regulation**

**in animal development. In any case, new questions are raised by the data: how can the differences between mammals and insects be compatible with conservation of homeobox gene function? Did the evolution of animal form involve a proliferation of new homeodomain proteins, new modes of regulation of existing gene types, or new relationships with target genes, or is evolutionary change largely the province of other classes of genes? In this review, we summarize what is known about conservation of homeobox gene function.**

Key words: homeobox, homeodomain, homeotic, Hox, conserved, evolution

### INTRODUCTION

We celebrate this year two anniversaries. A century has passed since Bateson described and named homeotic mutations (Bateson, 1894). A decade has passed since the homeobox was discovered (McGinnis et al., 1984; Scott and Weiner, 1984). The protein fragment encoded by the homeobox, the DNA-binding homeodomain, is now viewed as a hallmark of transcription factors which control development in organisms as diverse as yeast, plants, insects and mammals.

The remarkable conservation of protein structures among developmental regulators is now so well established that apparent cases of lack of conservation are viewed with skepticism. Does conserved structure mean conserved function? The examples given below strongly suggest in several cases that homeodomain proteins of certain classes became dedicated to particular functions long ago and have maintained their dedication in ways that we do not fully understand. The homeodomain proteins, particularly the HOM/Hox group, remain the most dramatic example of retention of both protein structure and function during the evolution of developmental processes. Yet animals have enormous variety both in final form and how they develop. Attention therefore turns to learning how universal classes of developmental regulators give rise to diversity of form. In this review we focus on known or potentially conserved functions of homeodomain proteins and their regulators and targets.

### HOMEODOMAINS ARE MEMBERS OF A STRUCTURAL SUPERFAMILY

Two crystal structures of homeodomains bound to DNA, and

one NMR solution structure, have revealed a conserved structure for proteins sharing only 25% amino acid identity, or 15 amino acids of 60 (Qian et al., 1989; Kissinger et al., 1990; Wolberger et al., 1991). Because most homeodomains are more similar than this, the presently recognized homeodomains almost certainly have nearly identical backbone structures. The three alpha helical parts of the homeodomain create an internal hydrophobic core. One of these helices inserts into the major groove of the DNA and makes sequence-specific contacts. The N terminus of the homeodomain makes contact with the minor groove and stabilizes the association with DNA.

When we reviewed the extant 82 homeodomain sequences in 1989 (Scott et al., 1989), four amino acids were found to be diagnostic for homeodomains. The only exception was one of the yeast MAT proteins, which had three of the four relevant residues and a conservative change in the fourth. The definition has been useful, in that no protein clearly outside the homeodomain group has been found to have the critical four residues. However, the definition is arbitrary and reflects our limited ability to infer protein structure from primary sequences. Now there is evidence for an extended family of proteins which use an alpha helix to contact DNA in the major groove (Steitz, 1990; Pabo and Sauer, 1992; Schwabe and Travers, 1993).

Homeodomains are related in structure to helix-turn-helix proteins of bacteria (Laughon and Scott, 1984; Qian et al., 1989; Kissinger et al., 1990) and also to the POU-specific domain which is found in a family of proteins adjacent to a characteristic POU type of homeodomain. The POU-specific domain is astonishingly similar to the DNA-binding domain of the cI repressor protein of bacteriophage lambda (Assa-Munt

et al., 1993). POU proteins therefore have two DNA-binding domains, each of which is similar to helix-turn-helix proteins. The structure of a member of a third group of proteins, the *forkhead/HNF3* group, reveals yet another set of relationships. The DNA-binding forkhead domain is most similar to eukaryotic histone H5 and to the catabolite activator protein (CAP) of *E. coli*. (Clark et al., 1993a) and is therefore yet another variation on helix-turn-helix. All of the proteins in the family use a single alpha helix to make the major groove contacts with DNA, but use somewhat different framework structures to form the rest of the domain. The three groups of proteins, homeodomain, POU and forkhead, are related at the structural level without the primary sequence being discernably similar. As more protein structures are determined, the family may expand. The structural relationships between the different DNA-binding domains make it difficult to rigorously define separate families.

Within the homeodomain group different classes can be defined based on primary sequence and these classes are remarkably distinctive in their functions; those functions are, in at least some cases, conserved across vast evolutionary distances. Representative sequences of a variety of classes have been described in Rubenstein and Puelles (1994) and in Duboule (1994).

## FROM HEAD TO TAIL: HOX GENE ORGANIZATION

In all animals studied to date there is a cluster of homeobox genes known as HOM-C in insects and nematodes and HOX in mammals (McGinnis and Krumlauf, 1992). We will use the term HOX to refer to all such clusters (there are many homeobox genes; only those in these particular homologous clusters are called Hox genes). Key features of HOX clusters were first observed in studies of a *Drosophila* cluster, the bithorax complex (BX-C), by E. B. Lewis (Lewis, 1963). In *Drosophila* the primordial cluster appears to have split into two major parts, the second of which is the Antennapedia complex (ANT-C) whose organization and similarity to the BX-C was recognized and analyzed by T. C. Kaufman and colleagues (Kaufman et al., 1980). Consistent with the idea of a single primordial cluster, the flour beetle *Tribolium* contains a single complex of homeotic genes (Beeman et al., 1989) as does the chordate *Amphioxus* (P. W. H. Holland, personal communication). The nematode *Caenorhabditis elegans* has a cluster composed of at least five genes (Kenyon and Wang, 1991; Wilson et al., 1994).

The organization of Hox genes in mice (and humans), *Drosophila* and *C. elegans* is summarized in Fig. 1. At least four types of Hox gene appear to have existed prior to the divergence of the ancestors of these diverse animals: the *labial*, *Deformed*, *Antennapedia* and *AbdominalB* types, each of which is represented in these animals. In addition, genes related to the fly *empty spiracles* (*ems*) or *Distal-less* (*Dll*) genes are found in or near the worm and mammalian complexes (Boncinelli et al., 1993; Wang et al., 1993). The worm *ems*-like gene is about equally similar to the *ems* and *Distal-less* (*Dll*) genes of flies, and therefore it is striking that two of the mammalian relatives of the *Dll* gene, *Dlx1* and *Dlx2*, are found near the *Hoxd* complex (McGuinness et al., 1992; Ozcelik et al., 1992; Simeone et al., 1994). The fly *ems* and *Dll*

genes are not found in either homeotic gene cluster (Cohen et al., 1989; Dalton et al., 1989), nor are two mammalian *ems*-related genes *Emx1* and *Emx2* (Kastury et al., 1994). The presence of two *Evx* genes in the mammalian complexes (D'Esposito et al., 1991; Faiella et al., 1991) suggests still more dispersal, as the most similar fly gene, *even skipped*, is also not in either fly cluster. We are therefore left with a tentative view of an ancestral cluster containing representatives of the *lab*, *Dfd*, *Antp*, *AbdB*, *eve* and *ems* (*Dll*) types. One candidate for a seventh member of the ancestral cluster would be the genes represented in flies by *orthodenticle* (*otd*), another homeobox gene expressed in a discrete region along the anterior-posterior axis (Finkelstein et al., 1990) and in mammals by the related *Otx* genes (Simeone et al., 1992). However, the mammalian *Otx1* and *Otx2* genes do not map near any of the HOX complexes (Kastury et al., 1994).

Starting, then, from the possible ancestral cluster, what happened during the evolution of each animal type? The fly complex has been split at least once (ANT-C and BX-C) and possibly three other times (dispersion of *ems*, *eve* and *Dll*). Ironically, the fly clusters that gave rise to the mystery of how the genes are bound together may be the most dispersed of any complex yet studied. In addition, three additional homeobox genes and two other types of genes, cuticle protein genes and one encoding an immunoglobulin superfamily protein, exist in the ANT-C and may have formed by duplication or invasion, respectively (Kaufman et al., 1990). The additional homeobox genes are a pair of closely related *zen* genes, one of which is required for dorsal-ventral differentiation and the anterior-posterior maternal morphogen gene *bicoid* (*bcd*) (Berleth et al., 1988). The vertebrate protein with some similarity to *bcd* protein, *gooseoid* (Cho et al., 1991), is not known to be located near the HOX complexes. Similarly, the nematode complex is interrupted by other genes (Salser and Kenyon, 1994).

The mammalian cluster duplicated twice or three times to form four copies (Kappen et al., 1989). There are now 14 identifiable types of gene in the Hox complexes (apart from the nearby *Dlx* genes), called paralogs 1-13 and *Evx*. Paralog grouping is based on homeodomain sequence similarities as well as position within the cluster. Sequence alignments suggest the loss of paralogs from each of the clusters as shown (Fig. 1), plus the proliferation of members of the *AbdB* (paralog 9-13) group. The *Otx* genes may also have been lost, and the Hoxb and c clusters lack *Evx* representatives. The worm cluster is interrupted by other genes, like the fly cluster, and lacks any known representatives of the *eve* type.

The intriguing relationship between expression of Hox and HOM genes along the anteroposterior axis and their order along the chromosomes to which they map has been termed 'colinearity' and suggests a connection between structure of the HOM/Hox complexes and function of the genes within them. Perhaps this relationship reflects a requirement to position homeotic regulatory information of several genes in a well-defined order so that such information could influence more than one gene of the complex. If this were so, in addition to conservation of DNA encoding homeotic proteins, one would expect to find conservation of regulatory DNA within the HOM/Hox clusters. This has been shown in the case of the fly and mouse *Dfd* homologs, since regulatory sequences from either are able to respond to appropriate spatial cues when

introduced into the other species (Awgulewitsch and Jacobs, 1992; Malicki et al., 1992; see below).

## HOX GENE FUNCTIONS

Several rules governing homeotic gene function have been fairly well conserved. (1) Genes are ordered along the chromosome in the same order as their expression and function along the anterior-posterior axis of the animal. (2) More genes are usually expressed in more posterior regions. (3) Loss of gene function leads to loss of structures or to development of anterior structures where more posterior structures should have formed. (4) Activation of genes where they should be off, i.e. gain-of-function mutations, leads to posterior structures developing where more anterior structures would normally be found. To these generalizations we may add some molecular data. (5) Each homeotic gene contains a single homeobox and encodes a sequence-specific DNA-binding protein which acts as a transcription factor. Some encode a family of proteins with alternatively spliced mRNAs. (6) Most of the homeotic genes are transcribed in the same direction, with the 5' ends of transcription units oriented toward the posterior end of the HOX cluster.

In flies, the clustered homeotic genes of the Antennapedia and bithorax complexes determine segment identity by promoting the morphogenesis of appropriate anatomical structures within particular segmental or parasegmental domains of the body. These domains, which are reiterated units along the anterior-posterior axis, are established before the homeotic genes are active. The fly homeotic genes are not required for establishment of the segmental body plan, but only to govern segmental form. Mutations in fly homeotic genes lead to alterations in cell fate decisions, not changes in segment number. The epidermal expression patterns and sites of action are summarized in Fig. 2. A single fly homeotic protein, rather than a combination, is in some cases sufficient to activate a morphogenetic pathway. For example, ubiquitous expression during early embryogenesis of the *Ultrabithorax* homeotic gene, which normally promotes anterior abdomen identity and is transcribed primarily there, leads to specification of head and thoracic segments as anterior abdomen-like segments (Mann and Hogness, 1990). *Ubx* does not activate any other homeotic genes and represses some more anteriorly acting ones, so the *Ubx* protein is sufficient to organize pattern without other Hox proteins.

The *C. elegans* HOM-C or Hox genes (Kenyon and Wang, 1991) provide fascinating information about the effects of Hox genes on individual identified cells (reviewed in Salser and Kenyon, 1994). For example *mab-5* and *lin-39* govern migration of certain neuroblasts (Clark et al., 1993b; Salser et al., 1993); heat shock promoter activation of *mab-5* causes cells to change direction during their migration (Salser and Kenyon, 1992). The nematode genes are expressed in the order along the anterior-posterior axis expected from mouse and fly studies, even though the order of two of the nematode genes on the chromosome is inverted compared to other Hox genes (Fig. 1) (Cowing and Kenyon, 1992). Cross-regulatory interactions among the homeotic genes limit their domains of expression (Salser et al., 1993). Cell fates are controlled largely autonomously by the Hox genes (Salser and Kenyon, 1992;

Clark et al., 1993b). There are clear examples of combinatorial actions of the genes, as when cells fuse in response to *mab-5* and *lin-39* but not to either alone (Salser et al., 1993). In other cases the presence of one homeotic gene activity precludes evident action of another.

The vertebrate Hox genes also instruct cells to undergo appropriate developmental decisions. Hox genes are expressed in nearly every cell type, but have been most extensively studied for their roles in the developing central nervous system and axial skeleton. They are transcribed in limited regions along the anterior-posterior axis, like the fly genes, although in more substantially overlapping patterns. Fewer Hox genes are expressed in the anterior than posterior, suggesting that progressively more caudal structures may depend upon concerted actions of multiple homeotic proteins. However, the posterior prevalence model argues against this possibility (see below). The scarcity of antibody studies makes it difficult to ascertain whether multiple Hox proteins are found in the same cell, but this seems likely to be true given that this is the case in flies (Carroll et al., 1988). The picture is further complicated by the four sets of Hox genes (Fig. 1). Because it is often the case that corresponding paralogs in different Hox clusters are expressed in similar patterns, particularly for the *Hoxa* and *Hoxd* clusters, redundant or partially redundant function of the genes may make interpretation of mutations in only one gene difficult. This problem will soon be addressed by the engineering of doubly mutant transgenic mice, but in the meantime a considerable amount can be learned from single mutations. The mutations have been engineered in embryonic stem cells in culture and then introduced into the mouse germline. These mutants provide convincing evidence of homeosis and leave little doubt of the power of Hox genes to control cell fates during development.

In the central nervous system, the anterior border of expression of many of the Hox genes coincides with rhombomeric boundaries, the rhombomeres being transient, reiterated bulges of the hindbrain thought to be indicative of segmental organization of the brain. Loss-of-function mutations of *Hoxa-1* and *Hoxa-3* cause defects in hindbrain and branchial regions of the mouse, but do not appear to cause homeotic transformations of the affected regions (Chisaka and Capocchi, 1991; Lufkin et al., 1991; Carpenter et al., 1993). The cells affected by both mutations are derived from the cranial neural crest. A reduction in the number of rhombomeres was observed in *Hoxa-1* mutants (Lufkin et al., 1991; Carpenter et al., 1993). Mutations in the two fly homeobox genes *ems* and *otd*, not located in the HOX clusters but possibly there ancestrally, cause embryos to develop with altered fates in the head and with reduced numbers of segments. It has been suggested that deletion of body parts, in contrast to homeotic transformation, occurs when the absence of one homeotic gene function does not result in the expression of another in its place (McGinnis and Krumlauf, 1992). This idea may explain why both types of phenomena are observed in flies and in mice.

Targeted gene disruption of *Hoxc-8*, *Hoxb-4*, or *Hoxa-2*, as well as constitutive overexpression of *Hoxa-7*, *Hoxc-6*, *Hoxc-8* or *Hoxd-4*, causes homeotic transformations in mouse embryos (Kessel et al., 1990; Jegalian and De Robertis, 1992; Le Mouellic et al., 1992; Lufkin et al., 1992; Pollock et al., 1992; Gendron-Maguire et al., 1993; Ramirez-Solis et al., 1993; Rijli et al., 1993). In the *Hoxc-8* mutant, the first lumbar

## The HOX and HOM Complexes

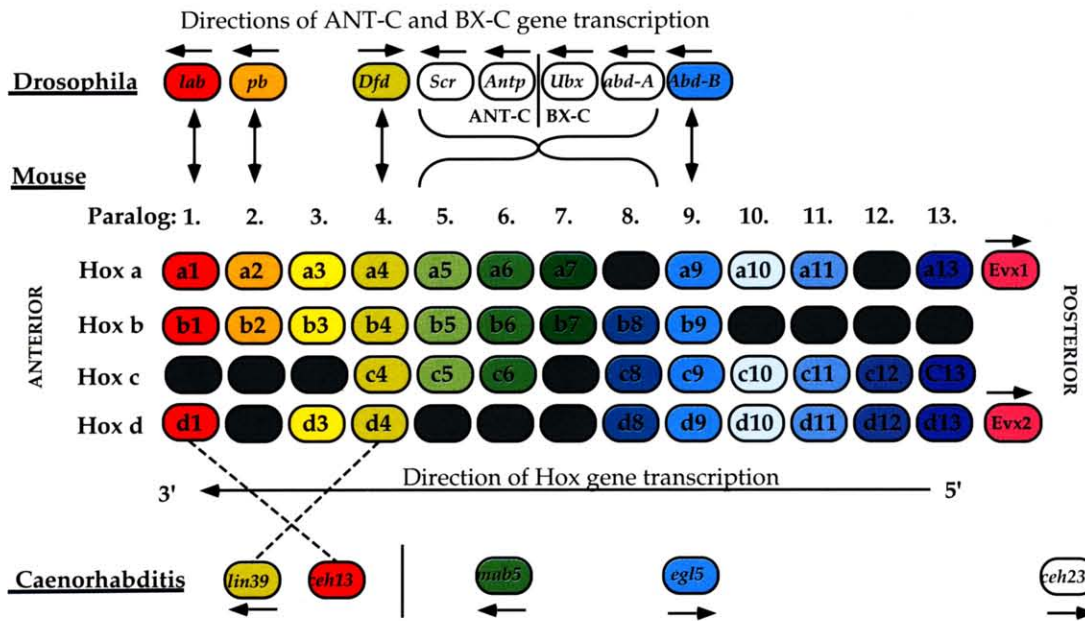

**Fig. 1.** Comparative organization of Hox complexes. The alignments of the *Drosophila*, nematode and mouse complexes are shown. Colors indicate similar homeodomain sequences. The order of the genes along the chromosome is as shown, with the order roughly corresponding to where along the anterior-posterior body axis a gene is expressed or, in the case of mammals, the anterior-most limit of expression. Mammalian nomenclature is as described in Scott (1992). The four mammalian clusters are thought to have arisen by two duplication events. Categories 1-13 are called 'paralog' groups and are indicative of homeodomain sequence similarity. Gray ovals indicate the lack of a paralog from a cluster. The *Evx* genes encode homeodomains most closely related to the *even skipped* segmentation gene of *Drosophila*. The assignment of *Scr*, *Antp*, *Ubx* and *abd-A* to any particular paralog group is uncertain. The *ceh-23* gene, located 30 kb from *egl-5* (Wang et al., 1993) is related to the *empty spiracles* or *Distal-less* genes of flies and mammals, and its presence near the nematode Hox cluster may be indicative of the ancestral linkage of this type of gene. Two related mammalian genes have been mapped near the Hox complexes with cytological studies but the molecular distance is unknown and could be substantial (McGuinness et al., 1992; Ozcelik et al., 1992; Simeone et al., 1994). The direction of *ceh-13* transcription is unknown. See text for additional references.

vertebra is converted to a thoracic vertebra, thus producing a 14th pair of ribs (Le Mouellic et al., 1992). Mice lacking *Hoxa-2* function have anterior transformations of skeletal elements derived from the second branchial arch (Rijli et al., 1993; Gendron-Maguire et al., 1993). Two *Hoxb-4* mutations have been introduced into mice, both of which cause transformations of the second cervical vertebra from axis to atlas (Ramirez-Solis et al., 1993). All of these phenotypes are consistent with loss-of-function homeotic transformations observed in flies: posterior structures are converted to more anterior ones.

Overexpression of either *Hoxa-7* or *Hoxd-4*, analogous to gain-of-function homeotic mutations in flies, leads to transformations of anterior structures into posterior structures (Kessel et al., 1990; Lufkin et al., 1992). *Hoxd-4* overexpression transforms occipital bones into structures that resemble cervical vertebrae whereas *Hoxa-7* overexpression transforms the basioccipital bone into a proatlas structure. Overexpression of *Hoxa-4* causes a condition similar to congenital megacolon, probably due to abnormalities in the enteric nervous system (Tennyson et al., 1993). Although this gene is expressed in a variety of tissues including spinal cord, ganglia and gut mesoderm, abnormalities were only observed in the terminal colon.

Mice that overexpress *Hoxc-6* (Jegalian and De Robertis, 1992), or *Hoxc-8* (Pollock et al., 1992), develop rib-bearing vertebrae in lieu of one (or more) of the lumbar vertebrae, a transformation of posterior to anterior similar to the *Hoxc-8* loss-of-function phenotype (Le Mouellic et al., 1992). Because *Hoxc-8* is normally expressed in that region, the *Hoxc-8* overexpression phenotype is presumably due to heightened or temporally incorrect expression. More work is needed to understand the origins of these effects, but the observed phenotypes could be partially explained if overexpression of *Hoxc-6* or *Hoxc-8* blocks function of *Hoxc-8* in its normal domain of expression.

A hierarchy of homeotic protein function exists amongst homeotic genes. Most fly HOM genes are unable to transform the identity of segments posterior to their normal domains of expression when activated ubiquitously, even though they are capable of transforming anterior segments (Gonzales-Reyes and Morata, 1990; Gonzales-Reyes et al., 1990; Mann and Hogness, 1990). There are exceptions: either *Antp* or *Scr* can prevail in the thorax (Gibson et al., 1990). Since the inability to transform posterior regions is dependent on posterior homeotic protein function, more posterior-acting homeotic proteins may be 'dominant' with respect to function over more anterior-acting proteins. This phenomenon has been termed

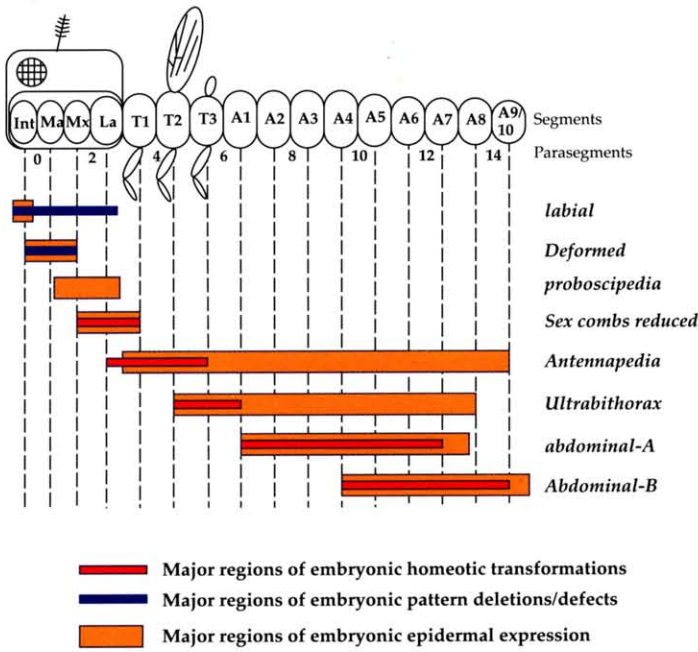

**Fig. 2.** Expression and function of the *Drosophila* HOM genes. Fly body segments include the intercalary (Int), mandibular (Ma) and labial (La) segments of the presumptive head, T1 to T3 segments of the presumptive thorax, and A1 to A10 segments of the presumptive abdomen. Normal expression patterns of *labial* (*lab*; Diederich et al., 1989), *Deformed* (*Dfd*; Jack et al., 1988; Mahaffey et al., 1989), *proboscipedia* (*pb*; Pultz et al., 1988; Mahaffey et al., 1989), *Sex combs reduced* (*Scr*; (Riley et al., 1987; Pattatucci and Kaufman, 1991), *Antennapedia* (*Antp*; Carroll et al., 1986; Wirz et al., 1986), *Ultrabithorax* (*Ubx*; Beachy et al., 1985; White and Wilcox, 1985; Carroll et al., 1988), *abdominal-A* (*abd-A*; Karch et al., 1990) and *Abdominal-B* (*Abd-B*; Celniker et al., 1989; DeLorenzi and Bienz, 1990) are indicated. Mutations in *Scr*, *Antp*, *Ubx*, *abd-A* and *Abd-B* produce homeotic transformations in the embryo whereas mutations in *lab* and *Dfd* produce pattern deletions. Alterations in mandibular, maxillary and labial segments in *lab* mutants may be due to the secondary effect of failure of head involution. *pb* is expressed in the embryo but no functions for it have been detected there. *pb* is located between *lab* and *Dfd* in the ANT-C complex.

‘phenotypic suppression’ (Gonzales-Reyes and Morata, 1990). A strikingly similar phenomenon is observed in mice. In general, mice mutant for Hox genes show homeotic transformations in the anteriormost region where that Hox gene is normally expressed and not within regions where a more posterior Hox gene is expressed (see Figs 4 and 5). Therefore, the more posterior Hox genes are able to promote the appropriate morphological responses without the assistance of more anterior genes (termed ‘posterior prevalence’ by Duboule, 1991). Consistent with these results, overexpression of two Hox genes in the mouse leads to posteriorization of anterior structures (Kessel et al., 1990; Lufkin et al., 1992); however, this is not the case for two other Hox genes, where overexpression leads to anteriorization in posterior regions (Fig. 5; Jegalian and De Robertis, 1992; Pollock et al., 1992). In the latter two cases levels or timing of expression may lead to the different outcome.

Elegant experiments by the McGinnis and Morata groups

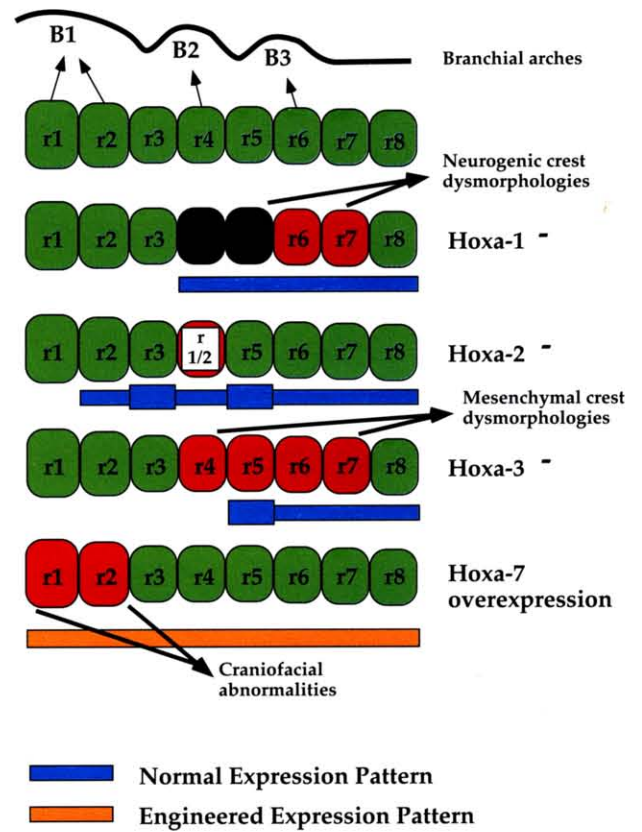

**Fig. 3.** Mouse Hox mutations affect cranial development. Rhombomeres 1 to 8 (r1-r8) are thought to represent segmental organization of the hindbrain. The first three branchial arches (b1-b3) are derived from neural crest cells which originate from specific rhombomeres (arrows) and produce head mesodermal structures such as bone and connective tissue. *Hoxa-1* mutations affect neurogenic crest-derived structures such as sensory and motor ganglia from the region encompassing rhombomeres 4 to 7. *Hoxa-3* mutations also affect this region of the hindbrain; however, dysmorphologies are specifically observed for mesenchymal crest-derived structures. For example, both the thymus and parathyroid glands fail to develop. Mice deficient in *Hoxa-2* show homeotic transformations of 2nd branchial arch derivatives to 1st branchial arch derivatives. Reichert’s cartilage, which forms the stapes bone of the middle ear as well as other structures, is replaced with Meckel’s cartilage, which forms the malleus and incus. *Hoxa-7* overexpression throughout the hindbrain produces craniofacial abnormalities such as cleft palate, open eyes and non-fused pinnae. These structures are derived from 1st branchial arch neural crest cells. *Hoxa-7* neural expression is normally confined to the spinal cord. For references, see text. Normal expression patterns are indicated, when appropriate, for *Hoxa-1* (Murphy and Hill, 1991), *Hoxa-2* (Hunt et al., 1991; Tan et al., 1992), *Hoxa-3* (Gaunt, 1988; Gaunt et al., 1988) and *Hoxa-7* (Mahon et al., 1988). See Krumlauf et al. (1993) for a review. Rhombomeres indicated by red color are affected by the indicated mutation. Rhombomeres indicated in black are deleted in the specified mutant. The anterior homeotic transformation of skeletal elements derived from the second branchial arch to structures normally derived from the first branchial arch (thus adopting fates of neural crest cells emanating from rhombomeres 1 and 2) in *Hoxa-2* mutants is indicated by the white box.

have demonstrated a functional relationship between the fly HOM and vertebrate Hox genes (Malicki et al., 1990; McGinnis et al., 1990; Bachiller et al., 1994). Ubiquitous

expression of mouse *Hoxb-6*, most closely related to the fly *Antp* gene, causes homeotic transformations in embryos that are similar in nature to those produced by ectopic expression of *Antp* (Malicki et al., 1990). In addition, antenna-to-leg transformations, the classic *Antp* gain-of-function phenotype, are observed in the adult head when *Hoxb-6* is ubiquitously expressed in larvae. Along the same lines, ubiquitous expression of the *Dfd* human homolog *Hoxd-4* can provide some functions attributed to *Dfd* such as autoactivation of the *Dfd* gene in embryos and larvae, producing phenotypic alterations of adult head structures similar to those observed with a dominant allele of *Dfd* (McGinnis et al., 1990).

Ubiquitous expression of several mouse Hoxd genes in flies (*Hoxd-8* to *Hoxd-11*) suppresses fly homeotic gene function, but in a most intriguing way (Bachiller et al., 1994). *Hoxd-8* is most closely related to the *Antp/Ubx/abd-A* class of homeobox genes whereas *Hoxd-9* to *Hoxd-11* are most closely related to the *Abd-B* gene. *Hoxd-8* to *Hoxd-11* are sequentially arranged along the chromosome 3' to 5' and act in progressively more posterior regions in the mouse. When expressed in flies, the more posterior acting Hox genes are better able to overcome the effects of the clustered fly homeotic genes than the anterior-acting genes. The result of such experiments is the transformation of affected segments to a thoracic ground-state character, even though endogenous fly homeotic genes in these regions are expressed at slightly reduced to normal levels (Bachiller et al., 1994). Thus, *Hoxd-8* or *Hoxd-9* prevails over head-specific homeotic genes, *Hoxd-10* prevails over head- and thorax-specific homeotic genes, and *Hoxd-11* prevails over head-, thorax- and abdominal-specific homeotic genes. In addition, *Hoxd-11* can activate the endogenous *Abd-B* gene as well as an *Abd-B* target (*empty spiracles*) even in the absence of endogenous *Abd-B*. Filzkörper, morphological readouts of *Abd-B* function, are ectopically induced by *Hoxd-11* in these experiments. Even though *Hoxd-9* to *Hoxd-11* all show an equal degree of similarity with respect to *Abd-B*, they still differ in terms of their ability to suppress the fly homeotics. Thus, the posterior prevalence rule holds: the farther back a mammalian gene is expressed, the better it is at overriding more anterior homeotic genes.

Most of the genes discussed so far act in the trunk of the animal. Additional Hox genes, and homeobox genes not presently found in all Hox complexes, act primarily in head development. At least some of these head homeobox genes may have once been located in a primordial homeotic complex. As mentioned previously, the vertebrate and nematode complexes provide evidence for an original Hox complex with more types of genes than the present fly complex. The head genes may have functions analogous to those of the Hox genes acting in the trunk, but the complexities of anterior structures make the regulatory roles of these genes less clear.

### HOMEBOX GENE FUNCTIONS IN THE ANTERIOR EMBRYO: EVIDENCE FOR MORE DIVERSE ORIGINAL HOX CLUSTERS

The Hox cluster genes *lab*, *Dfd* and *Scr* contribute to fly head patterning (Fig. 2). However none of the Hox genes 'cover' the most anterior parts of the embryo. The most anterior cells employ other genes, including at least three types of fly

homeobox genes (*Dll*, *otd* and *ems*) not present in the Hox cluster (Cohen and Jürgens, 1991; Finkelstein and Perrimon, 1991). *Dll* is expressed in the primordia of the limbs, in the brain and in head ectoderm, in particular the anlage of the facial sensory appendages within the labral, antennal, maxillary and labial segments (Cohen et al., 1989). *otd* and *ems* are expressed in the cephalic region of the head (Dalton et al., 1989; Finkelstein et al., 1990; Wieschaus et al., 1992), *otd* expression overlapping with *ems* but extending anterior to it. *otd* mutants have partial and complete deletions in pre-antennal and antennal segments, respectively, whereas mutants of *ems* lack antennal and intercalary segments. A smaller region of the pre-antennal segment is also deleted in *ems* mutants. Both *otd* and *ems* expression is dependent on bicoid and torso expression to define their posterior and anterior boundaries, respectively, but does not require gap or pair-rule segmentation gene input (Finkelstein and Perrimon, 1990). Based on expression patterns as well as genetic data, Cohen and Jürgens (1991) have proposed that both segmentation and segmental identity are controlled by *ems* and *otd* as well as *buttonhead* (*btd*), whose expression reaches more posteriorly than the other two. The model proposes that a segment's identity is determined by the particular combination of such genes expressed in a segment. For example, the antennal segment expresses *otd*, *ems* and *btd*, whereas the intercalary segment expresses only *ems* and *btd*.

The vertebrate homeobox genes related to the fly head genes are expressed in patterns similar to those of the fly genes, suggesting evolutionary conservation of function underlying dramatically different final morphologies. Four vertebrate genes, two homologous to *otd* (*Otx-1*, *Otx-2*) and two similar to *empty spiracles* (*Emx-1*, *Emx-2*), are primarily expressed in the anterior developing brain (Simeone et al., 1992). There are distinct overlaps in the patterns of expression of the four genes. *Otx-2* is most broadly expressed, from telencephalon to mesencephalon, inclusive. *Otx-1* expression is contained within that of *Otx-2*. Similarly, the *Emx* genes are expressed in a portion of the *Otx-1* domain and *Emx-1* is expressed within the *Emx-2* domain. In mice *Otx-2* expression appears earliest, at 7.5 days d.p.c., followed by *Otx-1* and *Emx-2* and then *Emx-1*. Thus different genes may be used for different stages of fate determination.

Six mouse *Distal-less* homologs have been isolated (Price et al., 1991). The expression patterns of four of them, *Dlx-1*, *Dlx-2*, *Dlx-5* and *Dlx-6*, have been reported (Dollé et al., 1992; Simeone et al., 1994). All four genes are expressed in the forebrain, the primordia of the face and neck (branchial arches), and the ectoderm of the limb buds, a pattern strikingly conserved from fly to mouse. In addition, *Dlx-5* and *Dlx-6* are expressed in the developing skeleton after early cartilage formation (Simeone et al., 1994). The first branchial arch, which has high levels of *Dlx* expression, gives rise to the mouth/jaw region of the mouse. In flies, the maxillary, labral and labial segments, domains of *Dll* expression, also give rise to mouth structures. There is no HOX expression in forebrain regions, so perhaps the *Dlx*, *Otx* and *Emx* gene activities determine cellular identity there. The idea of a commonality of gene functions in face and limbs between insects and vertebrates is nearly beyond belief, given the utterly different terminal morphologies. However, it was not long ago that homologies now generally accepted, such as Hox gene rela-

tionships, were rightly viewed with enormous skepticism! We will simply have to wait and see what is truly conserved.

The Hox clusters remain the most remarkable example of conservation of regulatory genes involved in development. While the parallels described here are striking, the differences in Hox gene expression and function among animal types are notable as well. The major problem that we face is in trying to understand what it means for a gene to define a certain region of the body. What is in common between the thorax of a fly and a human?

## POTENTIALLY CONSERVED FUNCTIONS OF OTHER CLASSES OF HOMEODOMAIN GENES

In addition to the clustered Hox genes, other distinctive types of homeodomain proteins appear to have evolutionarily conserved functions in development. The evidence is often weak but suggestive enough to warrant summarizing. We emphasize that many homeodomain proteins are used at different times and in different tissues, and only some of their functions may be conserved.

### *forkhead* and *caudal* in the gut

The *fork head* domain has a structure related to that of histone H5 and the bacterial CAP protein, and is more distantly related to homeodomains (Clark et al., 1993a). Like the homeodomain proteins, proteins containing forkhead/HNF3 domains may have evolutionarily conserved functions (Clevidence et al., 1993; Hromas et al., 1993). *forkhead* (*fkh*) is required for formation of the gut endoderm in flies (Jürgens and Weigel, 1988; Weigel et al., 1989). The HNF3 proteins were discovered as factors needed for transcription of genes in mammalian liver (Lai et al., 1991). Because the forkhead class of proteins has many other functions, however (Lai et al., 1993), the apparent similarity in some of those functions may or may not be meaningful.

A second homeobox gene likely involved in gut development is represented by *caudal* in flies (Mlodzik et al., 1985; Macdonald and Struhl, 1986) and by the *Cdx* genes in vertebrates (Duprey et al., 1988; Joly et al., 1992; Frumkin et al., 1993, 1994). In flies, *cad* is required for development of posterior cuticle structures. *cad* is also expressed in the developing gut. *Cdx* genes are expressed in the intestinal epithelium and mesenchyme and may be involved in gut closure.

### *prospero* and *cut* in the nervous system

The *prospero* 'family' of proteins is as yet represented by only two genes, but because they exist in both mammals and insects the family is probably genuine. These proteins have among the most divergent homeodomains known in higher animals. The mouse and fly proteins share both homeodomain and C-terminal protein sequences (Oliver et al., 1993). The *Drosophila pros* gene was identified as a regulator of neuron differentiation required after the completion of mitotic divisions (Doe et al., 1991; Vaessin et al., 1991). The gene is transcribed in embryonic neuroblasts and the mRNA is translated in descendant ganglion mother cells and young neurons. It is also expressed in the cone cells which secrete lens in the developing eye and in the midgut. The mammalian gene *Prox1*, which may or may not be the only mammalian version of *pros*,

is also active during neural development. The similarity extends to the types of cells in which both genes are active: undifferentiated neurons, eye lens, heart, pancreas, and liver. The strongest argument for genuine conservation is rather weak: expression in neurons after cell division but prior to differentiation.

The fly gene *cut* encodes a distinctive type of homeodomain protein (Blochliger et al., 1988). *cut* is expressed in many tissues, governing neural differentiation as well as other developmental events (Bodmer et al., 1987; Blochliger et al., 1990; Jack et al., 1991; Liu et al., 1991). A related mammalian gene called *Clox* is expressed in diverse tissues in mice (Andres et al., 1992) including cartilage, liver, skeletal muscle, brain, lung and heart. Thus both the vertebrate and invertebrate genes act in a diverse set of tissues; what links the different tissues together in terms of *cut* function is not yet clear. Each of the two proteins contains three 73 aa repeats outside the homeodomain, the *cut* repeats.

## MADS boxes and homeoboxes: the heart of the matter

The earliest known marker of vertebrate heart development is expression of the cardiac-specific homeobox gene *Csx* (Komuro and Izumo, 1993). *Csx* is expressed in the myocardium in 7.5 day mouse embryos, the late primitive streak stage when the future heart is just a small flattened plate. Thus the gene is active long before overt heart differentiation. Expression of *Csx* persists through adulthood. Although no functional studies are yet available, the great specificity of *Csx* expression strongly suggests a role in controlling heart muscle development.

A second early marker of heart development, though one that is also expressed in many other tissues, is the transcription factor MEF-2C (E. Olson, personal communication). MEF-2C is one of a family of transcription factors active in a broad range of mesodermal tissues. The protein contains a MADS box (Pollock et al., 1991), a sequence found in a larger family of proteins including serum response factor and some plant homeotic genes. The MEF group contains a MEF-specific domain adjacent to the MADS box. The best studied MADS box protein is a yeast transcription factor called MCM1. MCM1 associates with the repressor MAT $\alpha$ 2 to repress a mating type-specific genes (Johnson, 1992). The two proteins together therefore contribute to the control of yeast differentiation. It is the 70 amino acid MADS box region that binds to MAT $\alpha$ 2 and cooperates with it in binding DNA (Johnson, 1992).

A fly heart, or 'dorsal vessel', is completely different in appearance from a vertebrate heart. The embryonic heart is composed of several parallel rows of cells which later form loosely knit valves to move hemolymph through the larva without the use of ducts. Despite the drastic difference in morphology, the fly and vertebrate hearts have common genetic regulators. A MEF2-like gene, called DMEF2, has been found in flies and is expressed in the developing heart as well as in visceral mesoderm (Lilly et al., 1994). Not to be outdone, a homolog of *Csx* called *tinman* is expressed in the developing fly heart. *tinman* is expressed in both visceral mesoderm and heart earlier in embryogenesis, but comes to be restricted to the heart. Mutant animals that lack *tinman* function develop neither the visceral mesoderm nor the heart (Azpiazu and Frasch, 1993; Bodmer, 1993).

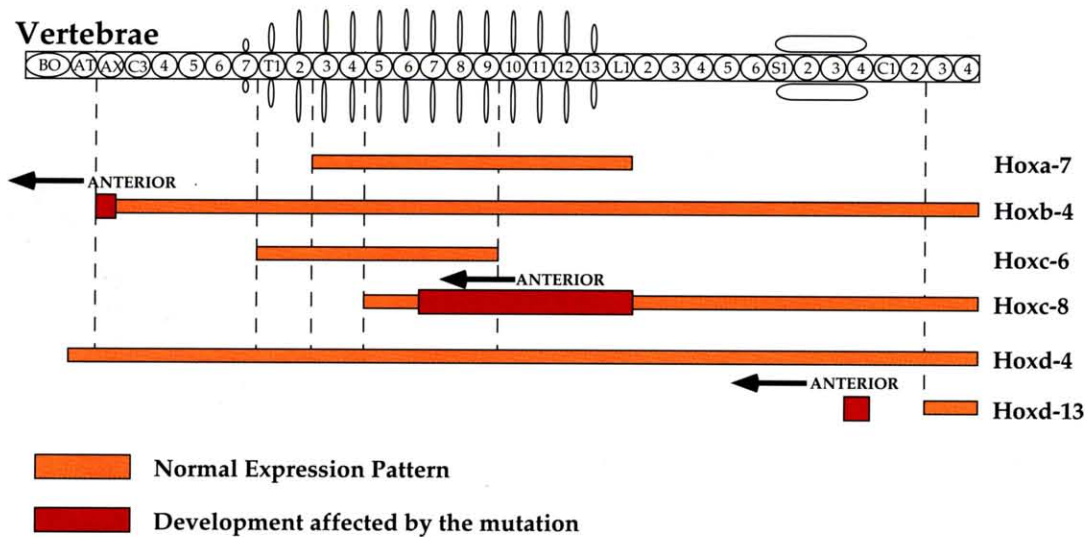

**Fig. 4.** Mouse Hox mutations result in anteriorly directed homeotic transformations in the paraxial mesoderm. A schematic representation of the vertebrae of the mouse is shown along with the expression patterns of several hox genes prior to vertebral specification. The basioccipital bone (BO) is connected to the cervical vertebrae (C3 through 7), which includes the atlas (AT) and axis (AX). Thirteen rib-bearing thoracic vertebrae (T1 to 13) are followed by six lumbar (L1 to 6), four

sacral (S1 to 4) and four caudal (C1 to 4) vertebrae. Normal expression patterns of *Hoxa-7* (Mahon et al., 1988), *Hoxb-4* (Gaunt et al., 1989), *Hoxc-6* (Sharpe et al., 1988), *Hoxc-8* (Gaunt, 1988; Gaunt et al., 1988), *Hoxd-4* (Gaunt et al., 1989) and *Hoxd-13* (Dolle et al., 1991) are indicated, although the precise location of boundaries of expression, especially posteriorly, is unclear at this time. In general, knockouts of *Hoxb-4*, *Hoxc-8* and *Hoxd-13* affect the most anterior region in which the gene is normally expressed. The homeotic transformations which result are in the anterior direction, as observed for loss-of-function homeotic mutations in flies. Although the phenotype observed for *Hoxd-13* mutations is consistent with a homeotic transformation, the authors argue that the phenotype could be due to altered growth properties of cells instead. It is also important to note that the reported expression pattern of *Hoxd-13* does not include the region of the vertebrae that is affected in the mutation. Expression may extend further anteriorly. Alternatively, cell non-autonomous events may dictate the phenotype. See text for additional references.

The presence of both types of regulatory molecule in corresponding tissues in animals with a common ancestor some 600 million years ago suggests the dedication of the two molecules to creation of a heart-like organ in the ancestors of insects and vertebrates. The relationship is remarkable given the utter disparity in structure. The results also suggest a possible intimate relationship between the MADS and *tinman* proteins, as in the yeast homeodomain-MADS box association.

### The *engrailed* group and neural development

The *engrailed* (*en*) gene in *Drosophila* is one of the few segment polarity genes that encodes a homeodomain-containing transcription factor. *En* is expressed in the posterior half of each segment in the ectoderm as well as in the developing nervous system (DiNardo et al., 1985; Kornberg et al., 1985). Flies homozygous for a special allele that allows adult survival have posterior wings similar in appearance to the anterior wing (Eker, 1929; Morata and Lawrence, 1975). Similarly, clones of cells in various adult tissues that lack *en* function exhibit posterior-to-anterior transformations of fate (Morata et al., 1983). Embryos homozygous for a null *en* allele have disruptions of pattern in each segment (Nüsslein-Volhard and Wieschaus, 1980; Kornberg, 1981). The closely linked *invected* gene is highly homologous to *en* and is expressed in a very similar or identical pattern.

*En* expression is initially under the control of pair-rule segmentation genes, but later comes under the influence of segment polarity genes such as *wingless*, the closest fly relative to the mammalian *Wnt-1* gene (DiNardo and O'Farrell, 1987; Ingham et al., 1988; Heemskerk et al., 1991). The gene also autoregulates. The successive waves of regulation may be typical for genes that remain active during a broad period of

development and which must be responsive to changing arrangements of cells.

In addition to its role in metamere specification, *en* is expressed in elaborate and precise segmentally reiterated patterns in the developing nervous system (Doe, 1992). Like the striped expression pattern of *en* in the epidermis, the neural pattern is exquisitely conserved in arthropods from flies to crayfish (Patel et al., 1989). Neural expression seems to be a more general phenomenon than the metameric expression since no other higher organisms included in this study express *en* in developing metameres.

Two mouse genes with significant homologies to the fly *en* genes have been identified and named EN-1 and EN-2 (Joyner and Martin, 1987). The genes are expressed in a similar pattern at the midbrain-hindbrain border. *Wnt-1*, which is activated earlier in development than EN-1 or 2 and is expressed at the midbrain-hindbrain border, is required for activation of both EN genes (Bally-Cuif et al., 1992). This relationship between these vertebrate genes is reminiscent of the *en-wg* interaction in flies. The result of the *Wnt-1* mutation in mice is the absence of the entire midbrain and part of the hindbrain (McMahon et al., 1992). Thus, *Wnt-1* is required in regions where it does not appear to be expressed. Several other vertebrate *en* genes have been isolated, including 3 from zebrafish, and their expression patterns are conserved to a large extent (see (Rubenstein and Puelles, 1994) for review). Loss-of-function mutations in EN-2 result in subtle disruptions of the cerebellum (Joyner et al., 1991; Millen et al., 1994), suggesting that EN-1 may be able to partially substitute for EN-2 in the mouse to mask the full phenotype. Nonetheless, in EN-2 mutants, several features of the phenotype are worth noting: (1) all major morphological defects occur in the posterior cerebellum, and (2) cerebellar



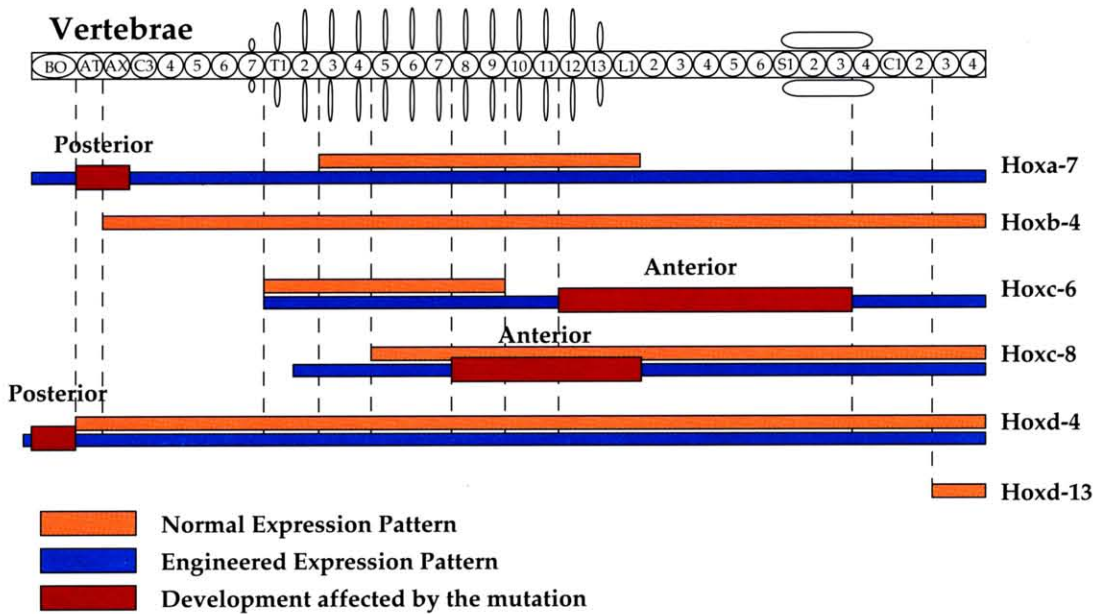

**Fig. 5.** Overexpression of Hox genes in the paraxial mesoderm causes homeotic transformations. A schematic representation of the vertebrae of the mouse is shown along with both normal and engineered hox expression in the paraxial mesoderm. Some Hox genes expressed anterior to their normal domains of expression cause posteriorized homeotic transformations (eg, *Hoxa-7* and *Hoxd-4* overexpressing mice) whereas other Hox genes expressed posterior to their normal domains of expression or at elevated levels cause anteriorized

homeotic transformations (eg, *Hoxc-6* and *Hoxc-8*). Results obtained with *Hoxa-7* and *Hoxd-4* overexpressing mice are consistent with the posterior prevalence model whereas results from *Hoxc-6* and *Hoxc-8* overexpressing mice are not (see text).

lobe identities appear to be changed. Two of the lobes are transformed from posterior to anterior identities whereas one lobe is transformed from an anterior to posterior identity. Thus, EN-2 subdivides the brain in vertebrates, as *en* subdivides *Drosophila* segments, and plays a role in cell fate determination. In fact, the fly *en* has been described both as a segmentation gene and as a homeotic gene.

Analyses of flies mutant for either of two segment polarity genes revealed that head expression of *en* is controlled differently than trunk expression (DiNardo et al., 1988; Heemskerk et al., 1991). It is possible that vertebrates have maintained anterior functions of *en* and have not adapted it for a role in segmentation. Moreover, consistent with its role in vertebrate brain development, flies mosaic for *engrailed*-lethal cells show abnormalities in the brain (Lawrence and Johnston, 1984). It will be interesting to learn whether the genes that regulate anterior and neural *en* expression in flies are similar in nature to those that regulate vertebrate *en* genes.

### The POU group

Comparison of sequences from several homeobox genes from mammals (*Pit-1*, *Oct-1*, *Oct-2*) and worms (*unc-86*) led to the discovery that in addition to highly conserved and distinctive homeoboxes, these genes contain another stretch of homology 5' to the homeobox (reviewed in Rosenfeld, 1991). These two regions of homology and the linker region between them encode what is now referred to as the POU domain. Subsequently, many other genes encoding POU-domain proteins were cloned, including several from *Drosophila* (Johnson and Hirsh, 1990; Dick et al., 1991; Lloyd and Sakonju, 1991; Treacy et al., 1991; Treacy et al., 1992; Affolter et al., 1993). The mammalian POU genes have been grouped into 6 classes based on sequence similarities (Wegner et al., 1993).

In addition to the homeodomain, these proteins share an approximately 70 amino acid domain amino terminal to the

homeodomain, the POU-specific domain, whose structure is discussed above. The POU-specific domain, located amino terminal to the homeodomain, is capable of binding DNA in the absence of the homeodomain, albeit poorly (Verrijzer et al., 1992). Thus, POU proteins contain two autonomous DNA-binding domains which work together to bind DNA avidly, with greater discriminatory capabilities. No gene identified to date contains a POU-specific domain in the absence of a homeodomain. The POU-specific domain in conjunction with the homeodomain is also required for homodimerization and heterodimerization of POU proteins (Ingraham et al., 1990; Voss et al., 1991; Verrijzer et al., 1992). The biological relevance of such interactions is unclear at this point, although in one case, heterodimerization of a *Drosophila* transactivator POU protein (*Cfla*) with another POU factor (*I-POU*) renders the complex unable to bind DNA in vitro (Treacy et al., 1991). POU domain proteins contain a variety of transactivation domains and have been shown to activate transcription in co-transfection assays (Theill et al., 1989; Ingraham et al., 1990; Muller et al., 1990; Tanaka and Herr, 1990).

In mammals, many genes encoding POU domain proteins are expressed during early embryogenesis. In addition to their expression in the developing nerve cord, several POU domain proteins are expressed in many regions of the developing brain, including forebrain (for review, see Rubenstein and Puelles, 1994). None of the HOX genes are expressed in the forebrain, so POU domain proteins may play a crucial role in patterning events in this region of the CNS. To date, the only vertebrate POU gene mutant analyzed, *Pit-1*, has its late expression in the anterior pituitary (Li et al., 1990; Radovick et al., 1992; Tatsumi et al., 1992; Pfaffle et al., 1992). In these mutants, several cell types of the anterior pituitary fail to develop, suggesting that *Pit-1* is important for their specification and maintenance. *Pit-1* target genes include those encoding growth hormone and prolactin.

In *Drosophila*, several genes encoding POU domain proteins have been cloned (for review, see Wegner et al., 1993). The fly proteins fall into similar classes as the mammalian proteins and may share at least part of their function. For example, the fly genes similar to *Oct-1* and *Oct-2* (*dOct-1*, *dOct-2*) are expressed in the brain and neural tube of the fly, as are their mammalian counterparts. Three other fly POU genes (*Cfla*, *I-POU*, *tI-POU*) and their mammalian relatives (*Brn-1*, *Brn-2*, *Brn-3.0*) are all expressed in nervous tissue.

### The Pax group

Vertebrate *Pax* genes are distinguished by the presence of a paired box, encoding a 128 amino acid DNA-binding domain, that is found in *Drosophila* pair-rule and segment polarity genes including *paired*, *gooseberry* and *gooseberry distal* (Bopp et al., 1986). In addition, two fly genes have been isolated that contain a paired box but no homeobox. One of these (*Pox meso*) is expressed in mesoderm whereas the other (*Pox neuro*) is expressed in the nervous system (Bopp et al., 1989). This second class of paired genes, whose products are localized to the nucleus and may act as transcriptional regulators, appears to be under the control of *paired* and other segmentation genes.

So far, ten *Pax* genes have been identified in mammals (for reviews, see Chalepakis et al., 1993; Rubenstein and Puelles, 1994). Out of eight mouse *Pax* genes, half (*Pax-1*, *Pax-2*, *Pax-5* and *Pax-8*) do not contain homeoboxes. The ones that contain both homeoboxes and paired boxes (*Pax-3*, *Pax-6*, *Pax-7*) are expressed earlier than the others, similar to what is observed in flies. The *Pax-1* gene, which is expressed in the mesoderm, shows a very high degree of sequence homology (90%) with *Pox meso* in the paired domain (Bopp et al., 1989). All *Pax* genes except *Pax-1* are expressed primarily in the nervous system, including neural tube, neural crest cells and brain, in distinct anteroposterior as well as dorsoventral patterns. *Pax* expression is seen in other tissues, including excretory system, muscle, pituitary, pancreas, thyroid, B-cells, ear, eye, limb bud and testes (reviewed in Chalepakis et al., 1993). Whether *Pax* genes are involved in establishing polarity of the embryo, or control specific differentiation events, is unclear at this time.

To date, three mouse mutant phenotypes have been shown to be caused by mutations in *Pax* genes. Mice that bear the *undulated* mutation, which consists of a missense mutation in the Paired box of *Pax-1*, show defects in the axial skeleton (Balling et al., 1988). *Splotch* alleles, mutations in the *Pax-3* gene, cause central nervous system disorders such as exencephalus and spina bifida in addition to abnormalities associated with structures derived from the neural crest (Epstein et al., 1991). Mutation of the *Pax-6* locus (*small eye*) results in mice that lack eyes and nasal structures (Hill et al., 1991). Two human conditions resembling *Splotch* and *small eye*, Waardenburg Syndrome I and Aniridia, are caused by mutations in the human *PAX3* and *PAX6* genes, respectively (Baldwin et al., 1992; Tassabehji et al., 1992). *PAX3* has also been implicated in human rhabdomyosarcomas (Shapiro et al., 1993). In an astonishing example of conservation, the gene *eyeless* of *Drosophila* has been found to encode a protein similar to *PAX6* (Quiring et al., 1994). Thus, *Pax-6* appears to have become dedicated to the visual part of the brain prior to the separation of vertebrate and invertebrate lineages. The strikingly distinct eye structures in

mammals and insects apparently conceal a startling common ancestry, much as in the case of the insect and vertebrate hearts.

### CONSERVATION UPSTREAM: ZINC FINGER PROTEINS AND LIGAND DEPENDENCE

In both vertebrates and insects, some mechanism must couple maternal or other positional information to the localized activation of the Hox genes. It is still not clear what if any components of this mechanism are similar in these two groups of animals. The apparently vast differences between the syncytial beginning of *Drosophila* embryogenesis and the formation of the inner cell mass in mammals suggests distinct mechanisms must exist, yet the outcome in both cases is differential anterior-posterior Hox expression. We face two mysteries: how Hox genes are regulated and how their different forms of regulation evolved.

There are few mammalian regulators of Hox genes known. The most intensively studied ones are retinoic acid (controlling transcription through its zinc finger protein receptor), the *Krox20* zinc finger protein and the *Sonic hedgehog* (*Shh*) signalling protein. Retinoic acid (RA) regulates Hox genes in cultured cells: the Hox genes are sequentially induced with time or with increased RA concentration (Mavilio et al., 1988). Elegant studies of *Krox20* regulation of *Hoxb2* in the hindbrain rhombomeres has established the high probability of a direct interaction with defined control elements (Sham et al., 1993). *Shh* activates Hox genes by acting as an apparent morphogen in limb development (Riddle et al., 1993). The *Shh* protein is a signalling protein and its receptor is unknown.

The regulation of vertebrate Hox genes by RA receptors and *Krox20* is reminiscent of some of the regulators of Hox gene expression in flies. The 'gap' segmentation genes have been found to regulate initiation of homeotic gene transcription (Harding and Levine, 1988; Irish et al., 1989). Gap genes encode zinc finger proteins, at least two of which, *knirps* and *tailless* proteins, are similar to steroid hormone receptors (Jäckle et al., 1985; Pignoni et al., 1990). There are no known ligands for the gap gene proteins. However, it is intriguing to suppose that ligands may be necessary in animals which, unlike *Drosophila*, do not pass through a syncytial stage of development. If the ligands are able to cross membranes they may function as RA may in mammals. Signalling molecules may govern transcription of Hox genes in both cases.

### MAINTENANCE OF REPRESSION

Many of the regulators of homeotic genes are expressed early in *Drosophila* development and then disappear. Yet the genes continue to be spatially regulated. Some progress has been made on understanding genes involved in the maintenance of active or repressed gene states, the genome expression memory systems. Very little is yet known of the extent to which similar systems exist in other animals. A process as fundamental as gene expression maintenance seems likely to be conserved (although animals differ greatly in the degree to which they methylate DNA).

Regulators of homeotic gene transcription have been grouped according to their negative or positive effects.

Members of the *Polycomb* group (Pc-G) are negative regulators required to keep homeotic genes inactive where they should be inactive (reviewed in Paro, 1993). Conversely, members of the trithorax group (Tr-G) have activating functions necessary to maintain homeotic transcription after it has been initiated (reviewed in Kennison, 1993). While these generalities are a good starting guide, the individual properties of many members of both groups have not been fully explored and it is likely that the grouping into positive and negative regulators masks unique attributes of the loci.

The view that Pc-G genes are involved in maintenance of homeotic gene expression is based upon experiments in which homeotic gene transcription was monitored in Pc-G mutants. Initial patterns were normal, but later transcripts were observed where they are not normally found (Struhl and Akam, 1985; Wedeen et al., 1986).

Protein products of three of the Pc-G genes have been localized to about 100 sites on the salivary gland polytene chromosomes (Zink and Paro, 1989; Zink et al., 1991; DeCamillis et al., 1992; Martin and Adler, 1993). The colocalization of the three negative regulators *Polycomb*, *Posterior sex combs* and *polyhomeotic* suggests a very close functional relationship, and indeed evidence has been obtained for a biochemically detectable protein complex containing *Pc* and *ph* proteins (Franke et al., 1992). The *Polycomb* protein contains a short sequence similar to a part of the *Drosophila* HP-1 heterochromatin protein, termed the chromodomain (Paro and Hogness, 1991). Proteins containing this domain have also been observed in vertebrates (Singh et al., 1991; Pearce et al., 1992). Beyond strengthening the hypothesis that Pc-G proteins repress through a mechanism related to heterochromatin-mediated inactivation, the chromodomain has been shown to be sufficient for chromosome localization at the proper 100 sites. Nothing is known about the degree to which *Polycomb* is functionally conserved in vertebrates.

A second case of conservation has also been found, involving the two Pc-G members *Su(z)2* and *Posterior sex combs* (*Psc*). Proteins coded by these two genes share similar regions with the *bmi-1* mammalian proto-oncogene (Brunk et al., 1991; van Lohuizen et al., 1991). Part of the similar region may be a novel type of zinc finger. The regions of similarity are dispersed through much of the proteins, suggesting conservation of a large domain or multiple domains.

### HRX, TRX AND LEUKEMIA

The *trithorax* (*trx*) gene in *Drosophila*, originally called *Regulator of bithorax*, is responsible for appropriate activation of Antennapedia and bithorax complex homeotic genes (Ingham and Whittle, 1980; Capdevila and Garcia-Bellido, 1981). Thus, *trx* mutant flies show homeotic transformations due to insufficient production of Hox proteins. The maintenance of expression of certain homeotic genes, eg *Ubx*, is more sensitive to the loss of *trx* than others such as *Antp* (Breen and Harte, 1993). Mutations in *Polycomb* group genes are suppressed by *trx* alleles (Ingham, 1983). Thus, reduced repressor function is balanced by reduced activator function. The *trx* gene has been cloned and shown to encode a very large protein (3759 amino acids) containing many cysteine-rich zinc finger-like domains which are found in proteins that bind DNA (Mazo et al., 1990).

The cloning of a gene involved in translocations associated with acute leukemias led to the discovery that it encodes a human *trx* homolog (*Hrx*; Djabali et al., 1992; Gu et al., 1992; Tkachuk et al., 1992). The encoded protein is 3968 amino acids in length and contains several zinc finger domains. The human protein contains several domains similar to DNA-binding AT hook motifs originally identified in HMG proteins, which are associated with active chromatin structures (Tkachuk et al., 1992). Three regions show homology to the fly *trx* protein, including a carboxy terminal domain that is 82% similar with 61% identity. *Hrx* is expressed during fetal development (Gu et al., 1992).

### UPSTREAM ACTIVATORS? THE SWI/SNF COMPLEX AND BRAHMA

*brahma* is another activator of homeotic gene transcription (Kennison and Tamkun, 1988; Tamkun et al., 1992). The encoded protein is similar to a yeast protein called SWI2 or SNF2, whose roles in regulating transcription are reviewed in Winston and Carlson (1992). SWI2, which encodes an ATPase (Laurent et al., 1993), is a member of a  $2 \times 10^6 M_r$  complex containing about ten proteins (Cairns et al., 1994; Peterson et al., 1994). Flies and mammals may contain a SWI/SNF complex of similar size (Khavari et al., 1993; J. W. Tamkun, personal communication). The yeast complex is thought to activate a subset of genes, possibly by opposing the repressive effects of chromatin (Peterson and Herskowitz, 1992). Proteins related to *brahma* have been identified in mammals, though their functions *in vivo* are unknown (Okabe et al., 1992; Soininen et al., 1992; Khavari et al., 1993; Muchardt and Yaniv, 1993).

### COLLABORATORS: THE EXD/PBX GROUP

The fly gene *extradenticle* (*exd*) may encode a cofactor that can work together with Hox transcription factors. *exd* mutations result in homeotic transformations of body segments, even though the homeotic genes are expressed at the appropriate times and places (Peifer and Wieschaus, 1990). The cloning of *exd* led to the exciting discovery that the *exd* gene encodes a homeodomain-containing protein with significant similarity to the products of two different genes, the yeast transcriptional repressor MATa1 (which itself is a cofactor for the homeodomain-containing MAT $\alpha$ 2 protein) and the human PBX homeobox gene family consisting of *PBX-1*, *PBX-2* and *PBX-3*. In yeast, the MATa1/MAT $\alpha$ 2 heterodimer, which is responsible for repressing haploid-specific genes, binds a different set of target sites than the MAT $\alpha$ 2 homodimer, which represses a1-specific genes. Similarly, the combined action of *exd* and the homeotic gene products could determine binding site selectivity. This may explain the lack of binding site discrimination observed for many homeodomain proteins in *in vitro* DNA binding assays.

Recently, it has been shown that the proper expression patterns of three target genes regulated by fly homeotic genes (*dpp*, *wg*, *tsh*; see below) require *exd* function (Rauskolb and Wieschaus, 1994). The normalcy of Hox gene expression and the altered expression of the target genes regulated by Hox

proteins is consistent with a model of *exd* protein as a cofactor of some sort.

PBX-1, one of three *exd*-like genes known in mammals (Monica et al., 1991), was cloned based on its involvement in chromosomal translocations associated with acute leukemias (Kamps et al., 1990; Nourse et al., 1990). One translocation results in the fusion of a portion of PBX-1 including its homeobox with a portion of a helix-loop-helix gene (E2A) with homologies to the *Drosophila daughterless* gene. This gene fusion was shown to be under the control of the E2A regulatory sequences. Further analysis has shown that the E2A/PBX fusion is necessary and sufficient to produce tumors when expressed in blood cells in the mouse (Dedera et al., 1993). The E2A region of the fusion contains a transcriptional activation domain and may be imparting on an otherwise 'inactive' PBX protein a transactivation capability. Since PBX does not activate transcription in co-transfection assays, it is intriguing to speculate that PBX must interact with other factors, perhaps Hox products, to regulate transcription of its target genes. Fusion of an activation domain to PBX might result in inappropriate regulation of these target genes.

### INFORMATION FLOWING DOWNSTREAM: ARE TARGETS CONSERVED?

The *Dfd* autoregulatory element is a well-characterized homeotic regulatory element (HRE). *Dfd* protein can activate the element and requires the homeodomain-binding sites within it to do so (Kuziora and McGinnis, 1988; Bergson and McGinnis, 1990; Regulski et al., 1991). Remarkably, the autoregulatory element may be conserved in function to mice, as an element from a mouse *Dfd*-like gene gives appropriate head-specific expression in response to *Dfd* in flies (Malicki et al., 1992). Conversely, the fly element drives localized expression in mouse brain (Awgulewitsch and Jacobs, 1992).

Few direct (or probably direct) target genes of Hox proteins have been identified (reviewed in White et al., 1992; Botas, 1993). The cross-regulatory interactions observed between fly Hox genes have not as yet been seen in mammals. The list of other target genes in flies is short and includes: *decapentaplegic* (*dpp*) and *wingless* in the midgut (Immerglück et al., 1990; Reuter et al., 1990; Capovilla et al., 1994), *teashirt* in the epidermis (Röder et al., 1992) and midgut (Mathies et al., 1994), *spalt* in imaginal discs (Wagner-Bernholz et al., 1991), *connectin* in neuromuscular tissue (Gould and White, 1992), *ems* in the epidermis (Jones and McGinnis, 1993) and *Distal-less* in leg primordia (Vachon et al., 1992). The last two cases mentioned may represent a type of cross-regulation if these genes were originally members of an ancestral Hox cluster.

Virtually nothing is known about target genes in mammals. An intriguing parallel is seen, however, in midgut development of flies and mice (Roberts et al., unpublished data). In flies the transcription of *dpp*, which encodes a TGF $\beta$ -class secreted protein, is activated by the *Ubx* homeotic protein in the visceral mesoderm. The two vertebrate proteins most similar to the *dpp* protein are bone morphogenetic proteins 2 and 4 (BMP2, 4; Jones et al., 1991). BMP2 is expressed in the visceral mesoderm of the chick in a region of the gut where homeotic genes are also expressed. The distinct, non-overlapping domains of homeotic gene expression in the *Drosophila* midgut are remi-

niscant of the discrete domains of Hox expression in the chick midgut. The boundaries of Hox gene expression correspond to the boundaries between different tissue types in the gut, suggesting regulation of gut differentiation by Hox genes may be common to insects and mammals, and may even involve some of the same target genes. The most direct evidence for a role of Hox genes in gut differentiation comes from the phenotype of ectopically expressed *Hoxc-8*, which causes defects in stomach differentiation (Pollock et al., 1992).

### CONCLUSIONS

We confront a remarkable array of conserved regulators of development. In some cases, but probably not all, the conservation goes beyond protein structure to conservation of the relationships between types of molecules and the parts of an animal that they control. In many cases the proteins are needed in a variety of tissues and cannot be viewed as dedicated to one organ or tissue. Functions common to many organisms may identify the original sites of gene action. Two questions of outstanding importance are: to what extent did proteins become dedicated to particular developmental processes more than half a billion years ago, and why? What special features of regulators allow them to play their roles? The tools to approach these questions are in hand and we can look forward to new views of developmental regulation when the next decade of homeobox research has passed.

We are grateful to Michael Akam, Laura Mathies and an anonymous reviewer for their helpful comments about an earlier draft. We thank Drs Edoardo Boncinelli, Gerald Crabtree, Walter Gehring, Peter Holland, Eric Olson, Cliff Tabin and John Tamkun for communication of results prior to publication. Research in our laboratory is supported by N.I.H. grant #18163 and by the Howard Hughes Medical Institute.

### REFERENCES

- Affolter, M., U. Walldorf, U. Kloter, A. F. Schier and W. J. Gehring (1993) Regional repression of a *Drosophila* POU box gene in the endoderm involves inductive interactions between germ layers. *Development* **117**, 1199-1210.
- Andres, V., G. B. Nadal and V. Mahdavi (1992) *Clox*, a mammalian homeobox gene related to *Drosophila cut*, encodes DNA-binding regulatory proteins differentially expressed during development. *Development* **116**, 321-334.
- Assa-Munt, N., R. J. Mortishire-Smith, R. Aurora, W. Herr and P. E. Wright (1993) The solution structure of the Oct-1 POU-specific domain reveals a striking similarity to the bacteriophage lambda repressor DNA-binding domain. *Cell* **73**, 193-205.
- Awgulewitsch, A. and D. Jacobs (1992) *Deformed* autoregulatory element from *Drosophila* functions in a conserved manner in transgenic mice. *Nature* **358**, 341-344.
- Azpiazu, N. and M. Frasch (1993) tinman and bagpipe: Two homeo box genes that determine cell fates in the dorsal mesoderm of *Drosophila*. *Genes Dev* **7**, 1325-1340.
- Bachiller, D., A. Macias, D. Duboule and G. Morata (1994) Conservation of a functional hierarchy between mammalian and insect Hox/HOM genes. *EMBO J* **13**, 1930-1941.
- Baldwin, C. T., C. F. Hoth, J. A. Amos, E. O. Da-Silva and A. Milunsky (1992) An exonic mutation in the *HuP2* paired domain gene causes Waardenburg's syndrome. *Nature* **355**, 637-638.
- Balling, R., U. Deutsch and P. Gruss (1988) *Undulated*, a mutation affecting the development of the mouse skeleton, has a point mutation in the paired box of *Pax-1*. *Cell* **55**, 531-535.

- Bally-Cuif, L., R. M. Alvarado-Mallart, D. K. Darnell and M. Wassef (1992) Relationship between *Wnt-1* and *En-2* expression domains during early development of normal and ectopic met-mesencephalon. *Development* **115**, 999-1009.
- Bateson, W. (1894) *Materials for the Study of Variation*. MacMillan & Co.
- Beachy, P. A., S. L. Helfand and D. S. Hogness (1985) Segmental distribution of bithorax complex proteins during *Drosophila* development. *Nature* **313**, 545-551.
- Beeman, R. W., J. J. Stuart, M. S. Haas and R. E. Denell (1989) Genetic analysis of the homeotic gene complex (HOM-C) in the beetle *Tribolium castaneum*. *Dev. Biol.* **133**, 196-209.
- Bergson, C. and W. McGinnis (1990) An autoregulatory enhancer element of the *Drosophila* homeotic gene *Deformed*. *EMBO J* **9**, 4287-4297.
- Berleth, T., M. Burri, G. Thoma, D. Bopp, S. Richstein, G. Frigerio, M. Noll and V. C. Nusslein (1988) The role of localization of bicoid RNA in organizing the anterior pattern of the *Drosophila* embryo. *EMBO J* **7**, 1749-1756.
- Blochlinger, K., R. Bodmer, J. Jack, L. Y. Jan and Y. N. Jan (1988) Primary structure and expression of a product from *cut*, a locus involved in specifying sensory organ identity in *Drosophila*. *Nature* **333**, 629-635.
- Blochlinger, K., R. Bodmer, L. Y. Jan and Y. N. Jan (1990) Patterns of expression of *cut*, a protein required for external sensory organ development in wild-type and *cut* mutant *Drosophila* embryos. *Genes Dev* **4**, 1322-1331.
- Bodmer, R. (1993) The gene *tinman* is required for specification of the heart and visceral muscles in *Drosophila*. *Development* **118**, 719-729.
- Bodmer, R., S. Barbel, S. Sheperd, J. W. Jack, L. Y. Jan and Y. N. Jan (1987) Transformation of sensory organs by mutations of the *cut* locus of *D. melanogaster*. *Cell* **51**, 293-307.
- Boncinelli, E., M. Gulisano and V. Broccoli (1993) *Emx* and *Otx* homeobox genes in the developing mouse brain. *J Neurobiol* **24**, 1356-1366.
- Bopp, D., M. Burri, S. Baumgartner, G. Frigerio and M. Noll (1986) Conservation of a large protein domain in the segmentation gene *paired* and in functionally related genes of *Drosophila*. *Cell* **47**, 1033-1040.
- Bopp, D., E. Jamet, S. Baumgartner, M. Burri and M. Noll (1989) Isolation of two tissue-specific *Drosophila* paired box genes, *pox meso* and *pox neuro*. *EMBO J* **8**, 1183-1190.
- Botas, J. (1993) Control of morphogenesis and differentiation by HOM/Hox genes. *Curr. Opin. in Cell Biol.* **5**, 1015-1022.
- Breen, T. R. and P. J. Harte (1993) trithorax Regulates multiple homeotic genes in the bithorax and Antennapedia complexes and exerts different tissue-specific, parasegment-specific and promoter-specific effects on each. *Development* **117**, 119-134.
- Brunk, B. P., E. C. Martin and P. N. Adler (1991) *Drosophila* genes *Posterior Sex Combs* and *Suppressor two of zeste* encode proteins with homology to the murine *bmi-1* oncogene. *Nature* **353**, 351-353.
- Cairns, B. R., Y. J. Kim, M. H. Sayre, B. C. Laurent and R. D. Kornberg (1994) A multisubunit complex containing the SWI1/ADR6, SWI2/SNF2, SWI3, SNF5, and SNF6 gene products isolated from yeast. *Proc. Natl Acad. Sci. USA* **91**, 1950-1954.
- Capdevila, M. P. and A. Garcia-Bellido (1981) Genes involved in the activation of the bithorax complex of *Drosophila*. *Wilhelm Roux Arch. Dev. Biol.* **190**, 339-350.
- Capovilla, M., M. Brandt and J. Botas (1994) Direct regulation of *decapentaplegic* by *Ultrabithorax* and its role in midgut morphogenesis. *Cell* **76**, 461-475.
- Carpenter, E. M., J. M. Goddard, O. Chisaka, N. R. Manley and M. R. Capecchi (1993) Loss of *Hox-A1* (*Hox-1.6*) function results in the reorganization of the murine hindbrain. *Development* **118**, 1063-1075.
- Carroll, S. B., S. DiNardo, P. H. O'Farrell, R. A. White and M. P. Scott (1988) Temporal and spatial relationships between segmentation and homeotic gene expression in *Drosophila* embryos: distributions of the *fushi tarazu*, *engrailed*, *Sex combs reduced*, *Antennapedia*, and *Ultrabithorax* proteins. *Genes Dev.* **2**, 350-360.
- Carroll, S. B., R. A. Laymon, M. A. McCutcheon, P. D. Riley and M. P. Scott (1986) The localization and regulation of *Antennapedia* protein expression in *Drosophila* embryos. *Cell* **47**, 113-122.
- Celniker, S. E., D. J. Keelan and E. B. Lewis (1989) The molecular genetics of the bithorax complex of *Drosophila*: characterization of the products of the *Abdominal-B* domain. *Genes Dev.* **3**, 1424-1436.
- Chalepakis, G., A. Stoykova, J. Wijnholds, P. Tremblay and P. Gruss (1993) Pax: Gene regulators in the developing nervous system. *J. Neurobiol.* **24**, 1367-1384.
- Chisaka, O. and M. R. Capecchi (1991) Regionally restricted developmental defects resulting from targeted disruption of the mouse homeobox gene *hox-1.5*. *Nature* **350**, 473-479.
- Cho, K. W., B. Blumberg, H. Steinbeisser and E. M. De Robertis (1991) Molecular nature of Spemann's organizer: the role of the *Xenopus* homeobox gene *gooseoid*. *Cell* **67**, 1111-1120.
- Clark, K. L., E. D. Halay, E. Lai and S. K. Burley (1993a) Co-crystal structure of the HNF-3/fork head DNA-recognition motif resembles histone H5. *Nature* **364**, 412-420.
- Clark, S. G., A. D. Chisholm and H. R. Horvitz (1993b) Control of cell fates in the central body region of *C. elegans* by the homeobox gene *lin-39*. *Cell* **74**, 43-55.
- Clevidence, D. E., D. G. Overdier, W. Tao, X. Qian, L. Pani, E. Lai and R. H. Costa (1993) Identification of nine tissue-specific transcription factors of the hepatocyte nuclear factor 3/forkhead DNA-binding-domain family. *Proc. Natl Acad. Sci. USA* **90**, 3948-3952.
- Cohen, S. and G. Jürgens (1991) *Drosophila* headlines. *Trends Genet* **7**, 267-272.
- Cohen, S. M., G. Bronner, F. Kuttner, G. Jürgens and H. Jäckle (1989) *Distal-less* encodes a homeodomain protein required for limb development in *Drosophila*. *Nature* **338**, 432-434.
- Cowing, D. W. and C. Kenyon (1992) Expression of the homeotic gene *mab-5* during *Caenorhabditis elegans* embryogenesis. *Development* **116**, 481-490.
- D'Esposito, M., F. Morelli, D. Acampora, E. Migliaccio, A. Simeone and E. Boncinelli (1991) EVX2, a human homeobox gene homologous to the *even-skipped* segmentation gene, is localized at the 5' end of HOX4 locus on chromosome 2. *Genomics* **10**, 43-50.
- Dalton, D., R. Chadwick and W. McGinnis (1989) Expression and embryonic function of *empty spiracles*: A *Drosophila* homeobox gene with two patterning functions on the anterior-posterior axis of the embryo. *Genes Dev.* **3**, 1940-1956.
- DeCamillis, M., N. Cheng, D. Pierre and H. W. Brock (1992) The polyhomeotic gene of *Drosophila* encodes a chromatin protein that shares polytene chromosome-binding sites with Polycomb. *Genes Dev.* **6**, 223-232.
- Dedera, D. A., E. K. Waller, D. P. LeBrun, A. Sen-Majumdar, M. A. Stevens, G. S. Barsh and M. L. Cleary (1993) Chimeric homeobox gene E2A-PBX1 induces proliferation, apoptosis, and malignant lymphomas in transgenic mice. *Cell* **74**, 833-843.
- DeLorenzi, M. and M. Bienz (1990) Expression of Abdominal-B homeoproteins in *Drosophila* embryos. *Development* **108**, 323-329.
- Dick, T., X. H. Yang, S. L. Yeo and W. Chia (1991) Two closely linked *Drosophila* POU domain genes are expressed in neuroblasts and sensory elements. *Proc. Natl Acad. Sci. USA* **88**, 7645-7649.
- Diederich, R. J., V. K. L. Merrill, M. A. Pultz and T. C. Kaufman (1989) Isolation, structure, and expression of *labial*, a homeotic gene of the Antennapedia Complex involved in *Drosophila* head development. *Genes Dev.* **3**, 399-414.
- DiNardo, S., J. M. Kuner, J. Theis and P. H. O'Farrell (1985) Development of embryonic pattern in *Drosophila melanogaster* as revealed by accumulation of the nuclear *engrailed* protein. *Cell* **43**, 59-69.
- DiNardo, S. and P. H. O'Farrell (1987) Establishment and refinement of segmental pattern in the *Drosophila* embryo: spatial control of *engrailed* expression by pair-rule genes. *Genes Dev.* **1**, 1212-1225.
- DiNardo, S., E. Sher, J. Heemskerk-Jorgens, J. Kassis and P. O'Farrell (1988) Two-tiered regulation of spatially patterned *engrailed* gene expression during *Drosophila* embryogenesis. *Nature* **332**, 604-609.
- Djabali, M., L. Selleri, P. Parry, M. Bower, B. D. Young and G. A. Evans (1992) A trithorax-like gene is interrupted by chromosome 11q23 translocations in acute leukaemias. *Nature Genetics* **2**, 113-118.
- Doe, C. Q. (1992) Molecular markers for identified neuroblasts and ganglion mother cells in the *Drosophila* central nervous system. *Development* **116**, 855-863.
- Doe, C. Q., L. Q. Chu, D. M. Wright and M. P. Scott (1991) The *prospero* gene specifies cell fates in the *Drosophila* central nervous system. *Cell* **65**, 451-464.
- Dolle, P., B. J. C. Izpisua, E. Boncinelli and D. Duboule (1991) The *Hox-4.8* gene is localized at the 5' extremity of the *Hox-4* complex and is expressed in the most posterior parts of the body during development. *Mech. Dev.* **36**, 3-13.
- Dollé, P., M. Price and D. Duboule (1992) Expression of the murine *Dlx-1* homeobox gene during facial, ocular and limb development. *Differentiation* **49**, 93-99.
- Duboule, D. (1991) Pattern formation in the vertebrate limb. *Curr. Opin. Genet. Dev.* **1**, 211-216.

- Duboule, D.** (1994) *Guidebook to the Homeotic Genes*. Oxford University Press, Cambridge.
- Duprey, P., K. Chowdhury, G. R. Dressler, R. Balling, D. Simon, J. L. Guenet and P. Gruss** (1988) A mouse gene homologous to the *Drosophila* gene *caudal* is expressed in epithelial cells from the embryonic intestine. *Genes Dev* **2**, 1647-1654.
- Eker, R.** (1929) The recessive mutant engrailed in *Drosophila melanogaster*. *Hereditas* **12**, 217-222.
- Epstein, D. J., M. Vekemans and P. Gros** (1991) *splotch* (Sp2H), a mutation affecting development of the mouse neural tube, shows a deletion within the paired homeodomain of Pax-3. *Cell* **67**, 767-774.
- Faiella, A., M. D'Esposito, M. Rambaldi, D. Acampora, S. Balsani, A. Stornaiuolo, A. Mallamaci, E. Migliaccio, M. Gulisano, A. Simeone and E. Boncinelli** (1991) Isolation and mapping of EVX1, a human homeobox gene homologous to *even-skipped*, localized at the 5' end of HOX1 locus on chromosome 7. *Nucleic Acids Res* **19**, 6541-6545.
- Finkelstein, R. and N. Perrimon** (1990) The *orthodenticle* gene is regulated by *bicoid* and *torso* and specifies *Drosophila* head development. *Nature* **346**, 485-488.
- Finkelstein, R. and N. Perrimon** (1991) The molecular genetics of head development in *Drosophila melanogaster*. *Development* **112**, 899-912.
- Finkelstein, R., D. Smouse, T. M. Capaci, A. C. Spradling and N. Perrimon** (1990) The *orthodenticle* gene encodes a novel homeo domain protein involved in the development of the *Drosophila* nervous system and ocellar visual structures. *Genes Dev* **4**, 1516-1527.
- Franke, A., M. DeCamillis, D. Zink, N. Cheng, H. W. Brock and R. Paro** (1992) Polycomb and polyhomeotic are constituents of a multimeric protein complex in chromatin of *Drosophila melanogaster*. *EMBO J* **11**, 2941-2950.
- Frumkin, A., R. Haffner, E. Shapira, N. Tarcic, Y. Gruenbaum and A. Fainsod** (1993) The chicken *CdxA* homeobox gene and axial positioning during gastrulation. *Development* **118**, 553-562.
- Frumkin, A., G. Pillemer, R. Haffner, N. Tarcic, Y. Gruenbaum and A. Fainsod** (1994) A role for *CdxA* in gut closure and intestinal epithelia differentiation. *Development* **120**, 253-263.
- Gaunt, S. J.** (1988) Mouse homeobox gene transcripts occupy different but overlapping domains in embryonic germ layers and organs: a comparison of *Hox-3.1* and *Hox-1.5*. *Development* **103**, 135-144.
- Gaunt, S. J., R. Krumlauf and D. Duboule** (1989) Mouse homeo-genes within a subfamily, *Hox-1.4*, *-2.6* and *-5.1*, display similar anteroposterior domains of expression in the embryo, but show stage- and tissue-dependent differences in their regulation. *Development* **107**, 131-141.
- Gaunt, S. J., P. T. Sharpe and D. Duboule** (1988) Spatially restricted domains of homeo-gene transcripts in mouse embryos: relation to a segmented body plan. *Development* **104** Supplement, 169-179.
- Gendron-Maguire, M., M. Mallo, M. Zhang and T. Gridley** (1993) *Hoxa-2* mutant mice exhibit homeotic transformation of skeletal elements derived from cranial neural crest. *Cell* **75**, 1317-1331.
- Gibson, G., A. Schier, P. LeMotte and W. J. Gehring** (1990) The specificities of Sex combs reduced and Antennapedia are defined by a distinct portion of each protein that includes the homeodomain. *Cell* **62**, 1087-1103.
- Gonzalez-Reyes, A. and G. Morata** (1990) The developmental effect of overexpressing a *Ubx* product in *Drosophila* embryos is dependent on its interactions with other homeotic products. *Cell* **61**, 515-522.
- Gonzalez-Reyes, A., N. Arquia, W. Gehring, G. Struhl and G. Morata** (1990) Are cross-regulatory interactions between homeotic genes functionally significant? *Nature* **344**, 78-80.
- Gould, A. P. and R. White** (1992) Connectin, a target of homeotic gene control in *Drosophila*. *Development* **116**, 1163-1174.
- Gu, Y., T. Nakamura, H. Alder, R. Prasad, O. Canaani, G. Cimino, C. M. Croce and E. Canaani** (1992) The t(4;11) chromosome translocation of human acute leukemias fuses the ALL-1 gene, related to *Drosophila* trithorax, to the AF-4 gene. *Cell* **71**, 701-708.
- Harding, K. and M. Levine** (1988) Gap genes define the limits of *Antennapedia* and *bithorax* gene expression during early development in *Drosophila*. *EMBO J* **7**, 205-214.
- Heemskerk, J., S. DiNardo, R. Kostriken and P. H. O'Farrell** (1991) Multiple modes of engrailed regulation in the progression towards cell fate determination. *Nature* **352**, 404-410.
- Hill, R. E., J. Favor, B. Hogan, C. Ton, G. F. Saunders, I. M. Hanson, J. Prosser, T. Jordan, N. D. Hastie and V. Van Heyningen** (1991) Mouse Small eye results from mutations in a paired-like homeobox-containing gene. *Nature* **354**, 522-525.
- Hromas, R., J. Moore, T. Johnston, C. Socha and M. Klemsz** (1993) *Drosophila* forkhead homologues are expressed in a lineage-restricted manner in human hematopoietic cells. *Blood* **81**, 2854-2859.
- Hunt, P., M. Gulisano, M. Cook, M. H. Sham, A. Faiella, D. Wilkinson, E. Boncinelli and R. Krumlauf** (1991) A distinct Hox code for the branchial region of the vertebrate head. *Nature* **353**, 861-864.
- Immerglück, K., P. A. Lawrence and M. Bienz** (1990) Induction across germ layers in *Drosophila* mediated by a genetic cascade. *Cell* **62**, 261-268.
- Ingham, P. W.** (1983) Differential expression of *bithorax* complex genes in the absence of the *extra sex combs* and *trithorax* genes. *Nature* **306**, 591-593.
- Ingham, P. W., N. E. Baker and A. A. Martinez** (1988) Regulation of segment polarity genes in the *Drosophila* blastoderm by *fushi tarazu* and *even-skipped*. *Nature* **331**, 73-75.
- Ingham, P. W. and R. Whittle** (1980) Trithorax: A new homeotic mutation of *Drosophila melanogaster* causing transformations of abdominal and thoracic segments. *Molec. Gen. Genet.* **179**, 607-614.
- Ingraham, H. A., S. E. Flynn, J. W. Voss, V. R. Albert, M. S. Kapiloff, L. Wilson and M. G. Rosenfeld** (1990) The POU-specific domain of Pit-1 is essential for sequence-specific, high affinity DNA binding and DNA-dependent Pit-1-Pit-1 interactions. *Cell* **61**, 1021-1033.
- Irish, V. F., A. Martinez-Arias and M. Akam** (1989) Spatial regulation of the *Antennapedia* and *Ultrabithorax* genes during *Drosophila* early development. *EMBO J* **8**, 1527-1537.
- Jack, J., D. Dorsett, Y. Delotto and S. Liu** (1991) Expression of the *cut* locus in the *Drosophila* wing margin is required for cell type specification and is regulated by a distant enhancer. *Development* **113**, 735-747.
- Jack, T., M. Regulski and W. McGinnis** (1988) Pair-rule segmentation genes regulate the expression of the homeotic selector gene, *Deformed*. *Genes Dev.* **2**, 635-651.
- Jäckle, H., U. B. Rosenberg, A. Preiss, E. Seifert, D. C. Knipple, A. Kienlin and R. Lehmann** (1985) Molecular analysis of Kruppel, a segmentation gene of *Drosophila melanogaster*. *Cold Spring Har. b Symp. Quant. Biol.* **50**, 465-473.
- Jegalian, B. G. and E. M. De Robertis** (1992) Homeotic transformations in the mouse induced by overexpression of a human Hox3.3 transgene. *Cell* **71**, 901-910.
- Johnson, A.** (1992) A combinatorial regulatory circuit in budding yeast. In *Transcriptional Regulation*, **2**, (Ed. McKnight, S. L. and K. R. Yamamoto). pp. 975-1006. Cold Spring Harbor Laboratory Press, Cold Spring Harbor, NY.
- Johnson, W. A. and J. Hirsh** (1990) Binding of a *Drosophila* POU-domain protein to a sequence element regulating gene expression in specific dopaminergic neurons. *Nature* **343**, 467-470.
- Joly, J. S., M. Maury, C. Joly, P. Duprey, H. Boulekbache and H. Condamine** (1992) Expression of a zebrafish caudal homeobox gene correlates with the establishment of posterior cell lineages at gastrulation. *Differentiation* **50**, 75-87.
- Jones, C. M., K. M. Lyons and B. L. M. Hogan** (1991) Involvement of *Bone Morphogenetic Protein-4* (BMP-4) and *Vgr-1* in morphogenesis and neurogenesis in the mouse. *Development* **111**, 531-542.
- Jones, B. and W. McGinnis** (1993) The regulation of *empty spiracles* by *Abdominal-B* mediates an abdominal segment identity function. *Genes Dev* **7**, 229-240.
- Joyner, A. L., K. Herrup, B. A. Auerbach, C. A. Davis and J. Rossant** (1991) Subtle cerebellar phenotype in mice homozygous for a targeted deletion of the *En-2* homeobox. *Science* **251**, 1239-1243.
- Joyner, A. L. and G. R. Martin** (1987) *En-1* and *En-2*, two mouse genes with sequence homology to the *Drosophila* engrailed gene: expression during embryogenesis [published erratum appears in *Genes Dev* 1987 Jul;1(5):521]. *Genes Dev* **1**, 29-38.
- Jürgens, G. and D. Weigel** (1988) Terminal vs. segmental development in the *Drosophila* embryo: the role of the homeotic gene *fork head*. *Roux's Arch. Dev. Biol.* **197**, 345-354.
- Kamps, M. P., C. Murre, X.-h. Sun and D. Baltimore** (1990) A new homeobox gene contributes the DNA binding domain of the t(1;19) translocation protein in pre-B ALL. *Cell* **60**, 547-555.
- Kaplan, C., K. Schughart and F. H. Ruddle** (1989) Two steps in the evolution of *Antennapedia*-class vertebrate homeobox genes. *Proc. Natl. Acad. Sci. USA* **86**, 5459-5463.
- Karch, F., W. Bender and B. Weiffenbach** (1990) *abdA* expression in *Drosophila* embryos. *Genes Dev* **4**, 1573-1587.
- Kastury, K., T. Druck, K. Huebner, C. Bartlett, D. Acampora, A. Simeone, A. Faiella and E. Boncinelli** (1994) Chromosome locations of human *EMX* and *OTX* genes. *Genomics*, in press.
- Kaufman, T. C., R. Lewis and B. Wakimoto** (1980) Cytogenetic analysis of

- chromosome 3 in *Drosophila melanogaster*: the homeotic gene complex in polytene chromosomal interval 84A, B. *Genetics* **94**, 115-133.
- Kaufman, T. C., M. A. Seeger and G. Olsen** (1990) Molecular and genetic organization of the Antennapedia gene complex of *Drosophila melanogaster*. *Adv. Genet.* **27**, 309-362.
- Kennison, J. A.** (1993) Transcriptional activation of *Drosophila* homeotic genes from distant regulatory elements. *Trends Genet.* **9**, 75-79.
- Kennison, J. A. and J. W. Tamkun** (1988) Dosage-dependent modifiers of *Polycomb* and *Antennapedia* mutations in *Drosophila*. *Proc. Natl. Acad. Sci. USA* **85**, 8136-8140.
- Kenyon, C. and B. Wang** (1991) A cluster of Antennapedia-class homeobox genes in a nonsegmented animal. *Science* **253**, 516-517.
- Kessel, M., R. Balling and P. Gruss** (1990) Variations of cervical vertebrae after expression of a Hox-1.1 transgene in mice. *Cell* **61**, 301-308.
- Khavari, P. A., C. L. Peterson, J. W. Tamkun, D. B. Mendel and G. R. Crabtree** (1993) BRG1 contains a conserved domain of the SWI2/SNF2 family necessary for normal mitotic growth and transcription. *Nature* **366**, 170-174.
- Kissinger, C. R., B. Liu, B. E. Martin, T. B. Kornberg and C. O. Pabo** (1990) Crystal structure of an engrailed homeodomain-DNA complex at 2.8 Å resolution: A framework for understanding homeodomain-DNA interactions. *Cell* **63**, 579-590.
- Komuro, I. and S. Izumo** (1993) Csx: a murine homeobox-containing gene specifically expressed in the developing heart. *Proc. Nat. Acad. Sci. USA* **90**, 8145-8149.
- Kornberg, T.** (1981) *engrailed*: a gene controlling compartment and segment formation in *Drosophila*. *Proc. Natl. Acad. Sci. USA* **78**, 1095-1099.
- Kornberg, T., I. Siden, P. O'Farrell and M. Simon** (1985) The *engrailed* locus of *Drosophila*: In situ localization of transcripts reveals compartment-specific expression. *Cell* **40**, 45-53.
- Krumlauf, R., H. Marshall, M. Studer, S. Nonchev, M. H. Sham and A. Lumsden** (1993) *Hox* homeobox genes and regionalisation of the nervous system. *J. Neurobiol.* **24**, 1328-1340.
- Kuziora, M. A. and W. McGinnis** (1988) Autoregulation of a *Drosophila* homeotic selector gene. *Cell* **55**, 477-485.
- Lai, E., K. L. Clark, S. K. Burley and J. Darnell Jr.** (1993) Hepatocyte nuclear factor 3/fork head or 'winged helix' proteins. *Proc. Nat. Acad. Sci. USA* **90**, 10421-10423.
- Lai, E., V. R. Prezioso, W. Tao, W. S. Chen and J. J. Darnell** (1991) Hepatocyte nuclear factor 3 $\alpha$  belongs to a gene family in mammals that is homologous to the *Drosophila* homeotic gene fork head. *Genes Dev* **5**, 416-427.
- Laughon, A. and M. P. Scott** (1984) Sequence of a *Drosophila* segmentation gene: protein structure homology with DNA-binding proteins. *Nature* **310**, 25-31.
- Laurent, B. C., I. Treich and M. Carlson** (1993) The yeast SNF2/SWI2 protein has DNA-stimulated ATPase activity required for transcriptional activation. *Genes Dev* **7**, 583-591.
- Lawrence, P. A. and P. Johnston** (1984) On the role of the *engrailed+* gene in the internal organs of *Drosophila*. *EMBO J* **3**, 2839-2844.
- Le Mouellic, H., Y. Lallemand and P. Brûlet** (1992) Homeosis in the mouse induced by a null mutation in the *Hox3.1* gene. *Cell* **69**, 251-264.
- Lewis, E. B.** (1963) Genes and developmental pathways. *Am. Zool.* **3**, 33-56.
- Li, S., E. I. Crenshaw, E. J. Rawson, D. M. Simmons, L. W. Swanson and M. G. Rosenfeld** (1990) Dwarf locus mutants lacking three pituitary cell types result from mutations in the POU-domain gene pit-1. *Nature* **347**, 528-533.
- Lilly, B., S. Galewsky, A. B. Firulli, R. A. Schulz and E. N. Olson** (1994) D-MEF2: A MADS box transcription factor expressed in differentiating mesoderm and muscle cell lineages during *Drosophila* embryogenesis. *Proc. Nat. Acad. Sci. USA*, in press.
- Liu, S., E. McLeod and J. Jack** (1991) Four distinct regulatory regions of the cut locus and their effect on cell type specification in *Drosophila*. *Genetics* **127**, 151-159.
- Lloyd, A. and S. Sakonju** (1991) Characterization of two *Drosophila* POU domain genes, related to oct-1 and oct-2, and the regulation of their expression patterns. *Mech. Dev.* **36**, 87-102.
- Lufkin, T., A. Dierich, M. LeMeur, M. Mark and P. Chambon** (1991) Disruption of the Hox-1.6 homeobox gene results in defects in a region corresponding to its rostral domain of expression. *Cell* **66**, 1105-1119.
- Lufkin, T., M. Mark, C. P. Hart, P. Dollé, M. LeMeur and P. Chambon** (1992) Homeotic transformation of the occipital bones of the skull by ectopic expression of a homeobox gene. *Nature* **359**, 835-841.
- Macdonald, P. M. and G. Struhl** (1986) A molecular gradient in early *Drosophila* embryos and its role in specifying the body pattern. *Nature* **324**, 537-545.
- Mahaffey, J. W., R. J. Diederich and T. C. Kaufman** (1989) Novel patterns of homeotic protein accumulation in the head of the *Drosophila* embryo. *Development* **105**, 167-174.
- Mahon, K. A., H. Westphal and P. Gruss** (1988) Expression of homeobox gene *Hox 1.1* during mouse embryogenesis. *Development* **104**, 187-195.
- Malicki, J., K. Schughart and W. McGinnis** (1990) Mouse *Hox-2.2* specifies thoracic segmental identity in *Drosophila* embryos and larvae. *Cell* **63**, 961-967.
- Malicki, J., L. C. Cianetti, C. Peschle and W. McGinnis** (1992) A human HOX4B regulatory element provides head-specific expression in *Drosophila* embryos. *Nature* **358**, 345-347.
- Mann, R. S. and D. S. Hogness** (1990) Functional dissection of Ultrabithorax proteins in *D. melanogaster*. *Cell* **60**, 597-610.
- Martin, E. C. and P. N. Adler** (1993) The Polycomb group gene *Posterior Sex Combs* encodes a chromosomal protein. *Development* **117**, 641-655.
- Mathies, L. D., S. Kerridge and M. P. Scott** (1994) Role of the *teashirt* gene in *Drosophila* midgut morphogenesis: secreted proteins mediate the action of homeotic genes. *Development* **120** (in press).
- Mavilio, F., A. Simeone, E. Boncinelli and P. W. Andrews** (1988) Activation of four homeobox gene clusters in human embryonal carcinoma cells induced to differentiate by retinoic acid. *Differentiation* **37**, 73-79.
- Mazo, A. M., D. H. Huang, B. A. Mozer and I. B. David** (1990) The trithorax gene, a trans-acting regulator of the bithorax complex in *Drosophila*, encodes a protein with zinc-binding domains. *Proc. Natl. Acad. Sci. USA* **87**, 2112-2116.
- McGinnis, W., R. L. Garber, J. Wirz, A. Kuroiwa and W. J. Gehring** (1984) A homologous protein-coding sequence in *Drosophila* homeotic genes and its conservation in other metazoans. *Cell* **37**, 403-408.
- McGinnis, N., M. A. Kuziora and W. McGinnis** (1990) Human *Hox-4.2* and *Drosophila Deformed* encode similar regulatory specificities in *Drosophila* embryos and larvae. *Cell* **63**, 969-976.
- McGinnis, W. and R. Krumlauf** (1992) Homeobox genes and axial patterning. *Cell* **68**, 283-302.
- McGuinness, T. L., G. P. MacDonald, T. K. Koch and J. L. R. Rubenstein** (1992) Evidence for linkage of *Tes-1* and *Dlx-1*, two homeobox genes expressed in the developing mammalian forebrain. *Soc. Neurosci. Abstract* #404.5.
- McMahon, A. P., A. L. Joyner, A. Bradley and J. A. McMahon** (1992) The midbrain-hindbrain phenotype of Wnt-1/-Wnt-1- mice results from stepwise deletion of engrailed-expressing cells by 9.5 days postcoitum. *Cell* **69**, 581-595.
- Millen, K. J., W. Wurst, K. Herrup and A. L. Joyner** (1994) Abnormal embryonic cerebellar development and patterning of postnatal foliation in two mouse *Engrailed-2* mutants. *Development* **120**, 695-706.
- Mlodzik, M., A. Fjose and W. J. Gehring** (1985) Isolation of caudal, a *Drosophila* homeobox-containing gene with maternal expressions whose transcripts form a concentration gradient at the pre-blastoderm stage. *EMBO J* **4**, 2961-2969.
- Monica, K., N. Galili, J. Nourse, D. Saltman and M. L. Cleary** (1991) PBX2 and PBX3, new homeobox genes with extensive homology to the human proto-oncogene PBX1. *Mol. Cell Biol.* **11**, 6149-6157.
- Morata, G., T. Kornberg and P. A. Lawrence** (1983) The phenotype of *engrailed* mutations in the antenna of *Drosophila*. *Dev. Biol.* **99**, 27-33.
- Morata, G. and P. A. Lawrence** (1975) Control of compartment development by the *engrailed* gene in *Drosophila*. *Nature* **255**, 614-617.
- Muchardt, C. and M. Yaniv** (1993) A human homolog of *Saccharomyces cerevisiae* SNF2/SWI2 and *Drosophila* *brm* genes potentiates transcriptional activation by the glucocorticoid receptor. *EMBO J.* **12**, 4279-4290.
- Muller, I. M. M., W. Schaffner and P. Matthias** (1990) Transcription factor Oct-2A contains functionally redundant activating domains and works selectively from a promoter but not from a remote enhancer position in non-lymphoid (HeLa) cells. *EMBO J.* **9**, 1625-1634.
- Murphy, P. and R. E. Hill** (1991) Expression of the mouse labial-like homeobox-containing genes, *Hox 2.9* and *Hox 1.6*, during segmentation of the hindbrain. *Development* **111**, 61-74.
- Nourse, J., J. D. Mellentin, N. Galili, J. Wilkinson, E. Stanbridge, S. D. Smith and M. L. Cleary** (1990) Chromosomal translocation t(1;19) results in the synthesis of a homeobox fusion mRNA that codes for a potential chimeric transcription factor. *Cell* **60**, 535-545.
- Nüsslein-Volhard, C. and E. Wieschaus** (1980) Mutations affecting segment number and polarity in *Drosophila*. *Nature* **287**, 795-801.
- Okabe, I., L. C. Bailey, O. Attree, S. Srinivasan, J. M. Perkel, B. C.**

- Laurent, M. Carlson, D. L. Nelson and R. L. Nussbaum (1992) Cloning of human and bovine homologs of SNF2/SWI2: A global activator of transcription in yeast *S. cerevisiae*. *Nuc. Acids. Res.* **20**, 4649-4655.
- Oliver, G., B. Sosa-Pineda, S. Geisendorf, E. P. Spana, C. Q. Doe and P. Gruss (1993) Prox1, a *prospero*-related homeobox gene expressed during mouse development. *Mech. Dev.* **44**, 3-16.
- Ozcelik, T., M. H. Porteus, J. L. R. Rubenstein and U. Francke (1992) *DLX2 (TES1)*, a homeobox gene of the *Distal-less* family, assigned to conserved regions on human and mouse chromosomes 2. *Genomics* **13**, 1157-1161.
- Pabo, C. O. and R. T. Sauer (1992) Transcription factors: Structural families and principles of DNA recognition. *Ann. Rev. Biochem.* **61**, 1053-1095.
- Paro, R. (1993) Mechanisms of heritable gene repression during development of *Drosophila*. *Curr. Opin. in Cell Biol.* **5**, 999-1005.
- Paro, R. and D. S. Hogness (1991) The Polycomb protein shares a homologous domain with a heterochromatin-associated protein of *Drosophila*. *Proc. Nat. Acad. Sci. USA* **88**, 263-267.
- Patel, N. H., E. Martin-Blanco, K. G. Coleman, S. J. Poole, M. C. Ellis, T. B. Kornberg and C. S. Goodman (1989) Expression of *engrailed* proteins in arthropods, annelids, and chordates. *Cell* **58**, 955-968.
- Pattatucci, A. M. and T. C. Kaufman (1991) The homeotic gene *Sex combs reduced* of *Drosophila melanogaster* is differentially regulated in the embryonic and imaginal stages of development. *Genetics* **129**, 443-461.
- Pearce, J., P. B. Singh and S. J. Gaunt (1992) The mouse has a Polycomb-like chromobox gene. *Development* **114**, 921-929.
- Peifer, M. and E. Wieschaus (1990) Mutations in the *Drosophila* gene *extradenticle* affect the way specific homeo domain proteins regulate segmental identity. *Genes Dev* **4**, 1209-1223.
- Peterson, C. L., A. Dingwall and M. P. Scott (1994) Five *SWI/SNF* gene products are components of a large multisubunit complex required for transcriptional enhancement. *Proc. Nat. Acad. Sci. USA* **91**, 2905-2908.
- Peterson, C. L. and I. Herskowitz (1992) Characterization of the yeast SWI1, SWI2, and SWI3 genes, which encode a global activator of transcription. *Cell* **68**, 573-583.
- Pfaffle, R. W., G. E. DiMattia, J. S. Parks, M. R. Brown, J. M. Wit, M. Jansen, H. Van Der Nat, J. L. Van Den Brande, M. G. Rosenfeld and H. A. Ingraham (1992) Mutation of the POU-specific domain of *Pit-1* and hypopituitarism without pituitary hypoplasia. *Science* **257**, 1118-1121.
- Pignoni, F., R. M. Baldarelli, E. Steingrimsson, R. J. Diaz, A. Patapoutian, J. R. Merriam and J. A. Lengyel (1990) The *Drosophila* gene *tailless* is expressed at the embryonic termini and is a member of the steroid receptor superfamily. *Cell* **62**, 151-163.
- Pollock, R. A., G. Jay and C. J. Bieberich (1992) Altering the boundaries of *Hox3.1* expression: evidence for antipodal gene regulation. *Cell* **71**, 911-923.
- Pollock, R. and R. Treisman (1991) Human SRF-related proteins: DNA-binding properties and potential regulatory targets. *Genes Dev.* **5**, 2327-2341.
- Price, M., M. Lemaistre, M. Pischetola, R. Di Lauro and D. DuBoule (1991) A mouse gene related to *Distal-less* shows a restricted expression in the developing forebrain. *Nature* **351**, 748-751.
- Pultz, M. A., R. J. Diederich, D. L. Cribbs and T. C. Kaufman (1988) The proboscipedia locus of the Antennapedia complex: a molecular and genetic analysis. *Genes Dev.* **2**, 901-920.
- Qian, Y. Q., M. Billeter, G. Otting, M. Müller, W. J. Gehring and K. Wüthrich (1989) The structure of the Antennapedia homeodomain determined by NMR spectroscopy in solution: Comparison with prokaryotic repressors. *Cell* **59**, 573-580.
- Quiring, R., U. Walldorf, U. Kloter and W. J. Gehring (1994) Homology of the *eyeless* gene of *Drosophila* to the *Small eye* gene in mice and *Aniridia* in humans. *Science*, in press.
- Radovick, S., M. Nations, Y. Du, L. A. Berg, B. D. Weintraub and F. E. Wondisford (1992) A mutation in the POU-homeodomain of Pit-1 responsible for combined pituitary hormone deficiency. *Science* **257**, 1115-1118.
- Ramirez-Solis, R., H. Zheng, J. Whiting, R. Krumlauf and A. Bradley (1993) *Hoxb-4 (Hox-2.6)* mutant mice show homeotic transformation of a cervical vertebra and defects in the closure of the sternal rudiments. *Cell* **73**, 279-294.
- Rauskolb, C. and E. Wieschaus (1994) Coordinate regulation of downstream genes by *extradenticle* and the homeotic selector proteins. *EMBO J*, in press.
- Regulski, M., S. Dessain, N. McGinnis and W. McGinnis (1991) High-affinity binding sites for the Deformed protein are required for the function of an autoregulatory enhancer of the Deformed gene. *Genes Dev* **5**, 278-286.
- Reuter, R., G. E. F. Panganiban, F. M. Hoffmann and M. P. Scott (1990) Homeotic genes regulate the spatial expression of putative growth factors in the visceral mesoderm of *Drosophila* embryos. *Development* **110**, 1031-1040.
- Riddle, R. D., R. L. Johnson, E. Laufer and C. Tabin (1993) *Sonic hedgehog* mediates the polarizing activity of the ZPA. *Cell* **75**, 1401-1416.
- Rijli, F. M., M. Mark, S. Lakkaraju, A. Dierich, P. Dollé and P. Chambon (1993) A homeotic transformation is generated in the rostral branchial region of the head by disruption of *Hoxa-2*, which acts as a selector gene. *Cell* **75**, 1333-1349.
- Riley, P. D., S. B. Carroll and M. P. Scott (1987) The expression and regulation of *Sex combs reduced* protein in *Drosophila* embryos. *Genes Dev.* **1**, 716-730.
- Röder, L., C. Vola and S. Kerridge (1992) The role of the *teashirt* gene in trunk segmental identity in *Drosophila*. *Development* **115**, 1017-1033.
- Rosenfeld, M. G. (1991) POU-domain transcription factors: Pou-er-ful developmental regulators. *Genes Dev* **5**, 897-907.
- Rubenstein, J. L. R. and L. Puelles (1994) Homeobox gene expression during development of the vertebrate brain. In *Current Topics in Developmental Biology*, (Ed. Pederson, R.) New York: Academic Press.
- Salser, S. J. and C. Kenyon (1992) Activation of a *C. elegans* Antennapedia homologue in migrating cells controls their direction of migration. *Nature* **355**, 255-258.
- Salser, S. J. and C. Kenyon (1994) Patterning *C. elegans*: homeotic cluster genes, cell fates and cell migrations. *Trends Genet.* **10**, 159-164.
- Salser, S. J., C. M. Loer and C. Kenyon (1993) Multiple HOM-C gene interactions specify cell fates in the nematode central nervous system. *Genes Dev.* **7**, 1714-1724.
- Schwabe, J. W. R. and A. A. Travers (1993) What is evolution playing at? *Current Biology* **3**, 628-630.
- Scott, M. P. (1992) Vertebrate homeobox gene nomenclature. *Cell* **71**, 551-553.
- Scott, M. P., J. W. Tamkun and G. W. Hartzell III (1989) The structure and function of the homeodomain. *BBA Rev. Cancer* **989**, 25-48.
- Scott, M. P. and A. J. Weiner (1984) Structural relationships among genes that control development: sequence homology between the *Antennapedia*, *Ultrabithorax*, and *fushi tarazu* loci of *Drosophila*. *Proc. Natl. Acad. Sci. USA* **81**, 4115-4119.
- Sham, M. H., C. Vesque, S. Nonchev, H. Marshall, M. Frain, R. Das Gupta, J. Whiting, D. Wilkinson, P. Charnay and R. Krumlauf (1993) The zinc finger gene *Krox20* regulates *HoxB2 (Hox2.8)* during hindbrain segmentation. *Cell* **72**, 183-196.
- Shapiro, D. N., J. E. Sublett, B. Li, J. R. Downing and C. W. Naeve (1993) Fusion of PAX3 to a member of the forkhead family of transcription factors in human alveolar rhabdomyosarcoma. *Cancer Res.* **53**, 5108-5112.
- Sharpe, P. T., J. R. Miller, E. P. Evans, M. D. Burtenshaw and S. J. Gaunt (1988) Isolation and expression of a new mouse homeobox gene. *Development* **102**, 397-407.
- Simeone, A., D. Acampora, M. Gulisano, A. Stornaiuolo and E. Boncinelli (1992) Nested expression domains of four homeobox genes in developing rostral brain. *Nature* **358**, 687-690.
- Simeone, A., D. Acampora, M. Pannese, M. D'Esposito, A. Stornaiuolo, M. Gulisano, A. Mallamaci, K. Kastury, T. Druck, K. Huebner and E. Boncinelli (1994) Cloning and characterization of two members of the vertebrate *Dlx* gene family. *Proc. Natl. Acad. Sci. USA* **91**, 2250-2254.
- Singh, P. B., J. R. Miller, J. Pearce, R. Kothary, R. D. Burton, R. Paro, T. C. James and S. J. Gaunt (1991) A sequence motif found in a *Drosophila* heterochromatin protein is conserved in animals and plants. *Nucleic Acids Res* **19**, 789-794.
- Soininen, R., M. Schoor, U. Henseling, C. Tepe, B. Kisters-Woike, J. Rossant and A. Gossler (1992) The mouse *Enhancer trap locus (Etl-1)*: A novel mammalian gene related to *Drosophila* and yeast transcriptional regulator genes. *Mech. Dev.* **39**, 111-123.
- Steitz, T. A. (1990) Structural studies of protein-nucleic acid interaction: the sources of sequence-specific binding. *Quart. Rev. Biophysics* **23**, 205-280.
- Struhl, G. and M. Akam (1985) Altered distributions of *Ultrabithorax* transcripts in *extra sex combs* mutant embryos of *Drosophila*. *EMBO J.* **4**, 3259-3264.
- Tamkun, J. W., R. Deuring, M. P. Scott, M. Kissinger, A. M. Pattatucci, T. C. Kaufman and J. A. Kennison (1992) *brahma*: A regulator of *Drosophila* homeotic genes structurally related to the yeast transcriptional activator SNF2/SWI2. *Cell* **68**, 561-572.
- Tan, D. P., J. Ferrante, A. Nazari, X. Shao, C. A. Kozak, V. Guo and M. Nirenberg (1992) Murine *Hox-1.11* homeobox gene structure and expression. *Proc. Natl. Acad. Sci. USA* **89**, 6280-6284.
- Tanaka, M. and W. Herr (1990) Differential transcriptional activation by Oct-



- 1 and Oct-2: interdependent activation domains induce Oct-2 phosphorylation. *Cell* **60**, 375-386.
- Tassabehji, M., A. P. Read, V. E. Newton, R. Harris, R. Balling, P. Gruss and T. Strachan** (1992) Waardenburg's syndrome patients have mutations in the human homologue of the *Pax-3* paired box gene. *Nature* **355**, 635-638.
- Tatsumi, K.-I., K. Miyai, T. Notomi, K. Kaibe, N. Amino, Y. Mizuno and H. Kohno** (1992) Cretinism with combined hormone deficiency caused by a mutation in the *PIT1* gene. *Nature Genet.* **1**, 56-58.
- Tennyson, V. M., M. D. Gershon, D. L. Sherman, R. R. Behringer, R. Raz, D. A. Crotty and D. J. Wolgemuth** (1993) Structural abnormalities associated with congenital megacolon in transgenic mice that overexpress the *Hoxa-4* gene. *Devel. Dynamics* **198**, 28-53.
- Theill, L. E., J. L. Castrillo, D. Wu and M. Karin** (1989) Dissection of functional domains of the pituitary-specific transcription factor GHF-1. *Nature* **342**, 945-948.
- Tkachuk, D. C., S. Kohler and M. L. Cleary** (1992) Involvement of a homolog of *Drosophila trithorax* by 11q23 chromosomal translocations in acute leukemias. *Cell* **71**, 691-700.
- Treacy, M. N., X. He and M. G. Rosenfeld** (1991) I-POU: A POU-domain protein that inhibits neuron-specific gene activation. *Nature* **350**, 577-584.
- Treacy, M. N., L. I. Neilson, E. E. Turner, X. He and M. G. Rosenfeld** (1992) Twin of I-POU: a two amino acid difference in the I-POU homeodomain distinguishes an activator from an inhibitor of transcription. *Cell* **68**, 491-505.
- Vachon, G., B. Cohen, C. Pfeifle, M. E. McGuffin, J. Botas and S. M. Cohen** (1992) Homeotic genes of the bithorax complex repress limb development in the abdomen of the *Drosophila* embryo through the target gene *Distal-less*. *Cell* **71**, 437-450.
- Vaessin, H., E. Grell, E. Wolff, E. Bier, L. Y. Jan and Y. N. Jan** (1991) prospero is expressed in neuronal precursors and encodes a nuclear protein that is involved in the control of axonal outgrowth in *Drosophila*. *Cell* **67**, 941-953.
- van Lohuizen, M., M. Frasch, E. Wientjens and A. Berns** (1991) Sequence similarity between the mammalian *bmi-1* proto-oncogene and the *Drosophila* regulatory genes *Psc* and *Su(z)2*. *Nature* **353**, 353-355.
- Verrijzer, C. P., O. J. Van, Van, der, Vliet and Pc** (1992) The Oct-1 POU domain mediates interactions between Oct-1 and other POU proteins. *Mol. Cell Biol.* **12**, 542-551.
- Voss, J. W., L. Wilson and M. G. Rosenfeld** (1991) POU-domain proteins Pit-1 and Oct-1 interact to form a heteromeric complex and can cooperate to induce expression of the prolactin promoter. *Genes Dev* **5**, 1309-1320.
- Wagner-Bernholz, J. T., C. Wilson, G. Gibson, R. Schuh and W. J. Gehring** (1991) Identification of target genes of the homeotic gene *Antennapedia* by enhancer detection. *Genes Dev.* **5**, 2467-2480.
- Wang, B. B., M. M. Müller-Immergluck, J. Austin, N. T. Robinson, A. Chisholm and C. Kenyon** (1993) A homeotic gene cluster patterns the anteroposterior body axis of *C. elegans*. *Cell* **74**, 29-42.
- Wedeen, C., K. Harding and M. Levine** (1986) Spatial regulation of *Antennapedia* and *bithorax* gene expression by the *Polycomb* locus in *Drosophila*. *Cell* **44**, 739-748.
- Wegner, M., D. W. Drolet and M. G. Rosenfeld** (1993) POU-domain proteins: structure and function of developmental regulators. *Curr. Op. Cell Biol.* **5**, 488-498.
- Weigel, D., G. Jürgens, F. Küttner, E. Seifert and H. Jäckle** (1989) The homeotic gene *fork head* encodes a nuclear protein and is expressed in the terminal regions of the *Drosophila* embryo. *Cell* **57**, 645-658.
- White, R., J. J. Brookman, A. P. Gould, L. A. Meadows, L. S. Shashidhara, D. I. Strutt and T. A. Weaver** (1992) Targets of homeotic gene regulation in *Drosophila*. *J Cell Sci* **16**, 53-60.
- White, R. A. H. and M. Wilcox** (1985) Regulation of the distribution of *Ultrabithorax* proteins in *Drosophila*. *Nature* **318**, 563-567.
- Wieschaus, E., N. Perrimon and R. Finkelstein** (1992) Orthodenticle activity is required for the development of medial structures in the larval and adult epidermis of *Drosophila*. *Development* **115**, 801-811.
- Wilson, R. and others** (1994) 2.2 Mb of contiguous nucleotide sequence from chromosome III of *C. elegans*. *Nature* **368**, 32-38.
- Winston, F. and M. Carlson** (1992) Yeast SNF/SWI transcriptional activators and the SPT/SIN chromatin connection. *Trends Genet.* **8**, 387-391.
- Wirz, J., L. Fessler and W. J. Gehring** (1986) Localization of the *Antennapedia* protein in the *Drosophila* embryo and imaginal discs. *EMBO J.* **5**, 3327-3334.
- Wolberger, C., A. K. Verson, B. Liu, A. D. Johnson and C. O. Pabo** (1991) Crystal structure of a MAT $\alpha$ 2 homeodomain-operator complex suggests a general model for homeodomain-DNA interactions. *Cell* **67**, 517-528.
- Zink, B., Y. Engström, W. J. Gehring and R. Paro** (1991) Direct interaction of the *Polycomb* protein with *Antennapedia* regulatory sequences in polytene chromosomes of *Drosophila melanogaster*. *EMBO J* **10**, 153-162.
- Zink, B. and R. Paro** (1989) In vivo binding pattern of a trans-regulator of homeotic genes in *Drosophila melanogaster*. *Nature* **337**, 468-471.
